# Supplementary material for: Large-scale identification of recurrent RNA edits in human embryos suggests their role in enhancing maternal mRNA clearance
Source: Research Square preprint supplement (doi:10.21203/rs.3.rs-1299690/v1), 2022-02-04
Supplement: Supplementary file 1 [file f1d7f7c8b1533a1924b41bfc.csv]

Archive with 1 entries (1 files):
- f1d7f7c8b1533a1924b41bfc.csv.out
