# Supplementary material for: Large-scale identification of recurrent RNA edits in human embryos suggests their role in enhancing maternal mRNA clearance
Source: Research Square preprint supplement (doi:10.21203/rs.3.rs-1299690/v1), 2022-02-04
Supplement: Supplementary file 1 [file f1d7f7c8b1533a1924b41bfc.csv › f1d7f7c8b1533a1924b41bfc.csv.out]

ID	Description	GeneRatio	BgRatio	pvalue	p.adjust	qvalue	geneID	Count	ontology	p.adjusted.BH.used.in.the.manuscript
GO:2000615	regulation of histone H3-K9 acetylation	2/40	12/21081	0.000228921620593549	0.0582044572498959	0.046326215436876	ENSG00000149554/ENSG00000197181	2	BP	0.0599118512530537
GO:0043966	histone H3 acetylation	3/40	64/21081	0.000243337931576581	0.0582044572498959	0.046326215436876	ENSG00000149554/ENSG00000163872/ENSG00000197181	3	BP	0.0599118512530537
GO:0043970	histone H3-K9 acetylation	2/40	14/21081	0.000314877051162729	0.0582044572498959	0.046326215436876	ENSG00000149554/ENSG00000197181	2	BP	0.0599118512530537
GO:0007100	mitotic centrosome separation	2/40	15/21081	0.000362883630129463	0.0582044572498959	0.046326215436876	ENSG00000149554/ENSG00000213024	2	BP	0.0599118512530537
GO:0051299	centrosome separation	2/40	16/21081	0.000414226468073095	0.0582044572498959	0.046326215436876	ENSG00000149554/ENSG00000213024	2	BP	0.0599118512530537
GO:0034587	piRNA metabolic process	2/40	19/21081	0.00058815072558449	0.0582044572498959	0.046326215436876	ENSG00000143194/ENSG00000197181	2	BP	0.0599118512530537
GO:0043046	DNA methylation involved in gamete generation	2/40	20/21081	0.000652716950351073	0.0582044572498959	0.046326215436876	ENSG00000143194/ENSG00000197181	2	BP	0.0599118512530537
GO:0035455	response to interferon-alpha	2/40	22/21081	0.000791664149209773	0.0582044572498959	0.046326215436876	ENSG00000159110/ENSG00000249624	2	BP	0.0599118512530537
GO:0050657	nucleic acid transport	4/40	222/21081	0.000812616248088582	0.0582044572498959	0.046326215436876	ENSG00000139496/ENSG00000132604/ENSG00000213024/ENSG00000164609	4	BP	0.0599118512530537
GO:0050658	RNA transport	4/40	222/21081	0.000812616248088582	0.0582044572498959	0.046326215436876	ENSG00000139496/ENSG00000132604/ENSG00000213024/ENSG00000164609	4	BP	0.0599118512530537
GO:0051236	establishment of RNA localization	4/40	225/21081	0.000854256434216545	0.0582044572498959	0.046326215436876	ENSG00000139496/ENSG00000132604/ENSG00000213024/ENSG00000164609	4	BP	0.0599118512530537
GO:0018205	peptidyl-lysine modification	5/40	440/21081	0.00139571797757539	0.0582044572498959	0.046326215436876	ENSG00000149554/ENSG00000139496/ENSG00000213024/ENSG00000163872/ENSG00000197181	5	BP	0.0629424430181405
GO:0006096	glycolytic process	3/40	119/21081	0.00148794870791449	0.0582044572498959	0.046326215436876	ENSG00000181192/ENSG00000139496/ENSG00000213024	3	BP	0.0629424430181405
GO:0006403	RNA localization	4/40	263/21081	0.00152025499038319	0.0582044572498959	0.046326215436876	ENSG00000139496/ENSG00000132604/ENSG00000213024/ENSG00000164609	4	BP	0.0629424430181405
GO:0006757	ATP generation from ADP	3/40	120/21081	0.00152410424219899	0.0582044572498959	0.046326215436876	ENSG00000181192/ENSG00000139496/ENSG00000213024	3	BP	0.0629424430181405
GO:0006406	mRNA export from nucleus	3/40	123/21081	0.0016358705656378	0.0582044572498959	0.046326215436876	ENSG00000139496/ENSG00000213024/ENSG00000164609	3	BP	0.0629424430181405
GO:0071427	mRNA-containing ribonucleoprotein complex export from nucleus	3/40	123/21081	0.0016358705656378	0.0582044572498959	0.046326215436876	ENSG00000139496/ENSG00000213024/ENSG00000164609	3	BP	0.0629424430181405
GO:0035456	response to interferon-beta	2/40	33/21081	0.00178580755563396	0.0582044572498959	0.046326215436876	ENSG00000159110/ENSG00000249624	2	BP	0.0629424430181405
GO:0046031	ADP metabolic process	3/40	128/21081	0.00183332911681019	0.0582044572498959	0.046326215436876	ENSG00000181192/ENSG00000139496/ENSG00000213024	3	BP	0.0629424430181405
GO:0006409	tRNA export from nucleus	2/40	34/21081	0.0018951483361547	0.0582044572498959	0.046326215436876	ENSG00000139496/ENSG00000213024	2	BP	0.0629424430181405
GO:0071431	tRNA-containing ribonucleoprotein complex export from nucleus	2/40	34/21081	0.0018951483361547	0.0582044572498959	0.046326215436876	ENSG00000139496/ENSG00000213024	2	BP	0.0629424430181405
GO:0060964	regulation of gene silencing by miRNA	3/40	130/21081	0.00191629551067108	0.0582044572498959	0.046326215436876	ENSG00000143194/ENSG00000139496/ENSG00000213024	3	BP	0.0629424430181405
GO:0008156	negative regulation of DNA replication	2/40	35/21081	0.00200759907853452	0.0582044572498959	0.046326215436876	ENSG00000132604/ENSG00000125482	2	BP	0.0629424430181405
GO:0015931	nucleobase-containing compound transport	4/40	285/21081	0.00203823325941613	0.0582044572498959	0.046326215436876	ENSG00000139496/ENSG00000132604/ENSG00000213024/ENSG00000164609	4	BP	0.0629424430181405
GO:0060147	regulation of posttranscriptional gene silencing	3/40	134/21081	0.00208918403264413	0.0582044572498959	0.046326215436876	ENSG00000143194/ENSG00000139496/ENSG00000213024	3	BP	0.0629424430181405
GO:0060966	regulation of gene silencing by RNA	3/40	134/21081	0.00208918403264413	0.0582044572498959	0.046326215436876	ENSG00000143194/ENSG00000139496/ENSG00000213024	3	BP	0.0629424430181405
GO:0006165	nucleoside diphosphate phosphorylation	3/40	136/21081	0.00217915153121618	0.0582044572498959	0.046326215436876	ENSG00000181192/ENSG00000139496/ENSG00000213024	3	BP	0.0629424430181405
GO:0006891	intra-Golgi vesicle-mediated transport	2/40	37/21081	0.00224178409448456	0.0582044572498959	0.046326215436876	ENSG00000122218/ENSG00000108433	2	BP	0.0629424430181405
GO:0051031	tRNA transport	2/40	37/21081	0.00224178409448456	0.0582044572498959	0.046326215436876	ENSG00000139496/ENSG00000213024	2	BP	0.0629424430181405
GO:0046939	nucleotide phosphorylation	3/40	138/21081	0.00227149754662359	0.0582044572498959	0.046326215436876	ENSG00000181192/ENSG00000139496/ENSG00000213024	3	BP	0.0629424430181405
GO:0060338	regulation of type I interferon-mediated signaling pathway	2/40	38/21081	0.00236349526804918	0.0582044572498959	0.046326215436876	ENSG00000159110/ENSG00000249624	2	BP	0.0629424430181405
GO:0097064	ncRNA export from nucleus	2/40	38/21081	0.00236349526804918	0.0582044572498959	0.046326215436876	ENSG00000139496/ENSG00000213024	2	BP	0.0629424430181405
GO:0009135	purine nucleoside diphosphate metabolic process	3/40	140/21081	0.00236624393506209	0.0582044572498959	0.046326215436876	ENSG00000181192/ENSG00000139496/ENSG00000213024	3	BP	0.0629424430181405
GO:0009179	purine ribonucleoside diphosphate metabolic process	3/40	140/21081	0.00236624393506209	0.0582044572498959	0.046326215436876	ENSG00000181192/ENSG00000139496/ENSG00000213024	3	BP	0.0629424430181405
GO:0071426	ribonucleoprotein complex export from nucleus	3/40	141/21081	0.00241452400971347	0.0582044572498959	0.046326215436876	ENSG00000139496/ENSG00000213024/ENSG00000164609	3	BP	0.0629424430181405
GO:0009185	ribonucleoside diphosphate metabolic process	3/40	143/21081	0.0025129112231577	0.0582044572498959	0.046326215436876	ENSG00000181192/ENSG00000139496/ENSG00000213024	3	BP	0.0629424430181405
GO:1900180	regulation of protein localization to nucleus	3/40	143/21081	0.0025129112231577	0.0582044572498959	0.046326215436876	ENSG00000139496/ENSG00000213024/ENSG00000170390	3	BP	0.0629424430181405
GO:0034605	cellular response to heat	3/40	147/21081	0.00271706713535357	0.0600035838092165	0.0477581800753821	ENSG00000139496/ENSG00000213024/ENSG00000164609	3	BP	0.0652865979772074
GO:0031503	protein-containing complex localization	4/40	309/21081	0.00273061816634708	0.0600035838092165	0.0477581800753821	ENSG00000139496/ENSG00000132604/ENSG00000213024/ENSG00000164609	4	BP	0.0652865979772074
GO:0071166	ribonucleoprotein complex localization	3/40	151/21081	0.00293120158465172	0.0628009939511631	0.0499847007066925	ENSG00000139496/ENSG00000213024/ENSG00000164609	3	BP	0.0685249792678579
GO:0060968	regulation of gene silencing	3/40	153/21081	0.0030420607840291	0.063586490046657	0.0506098944300605	ENSG00000143194/ENSG00000139496/ENSG00000213024	3	BP	0.069570607495622
GO:0006405	RNA export from nucleus	3/40	155/21081	0.00315547402015704	0.0643866960779664	0.0512467961168362	ENSG00000139496/ENSG00000213024/ENSG00000164609	3	BP	0.07062890785543
GO:0006090	pyruvate metabolic process	3/40	158/21081	0.00333042450750456	0.0648675864302593	0.0516295473890659	ENSG00000181192/ENSG00000139496/ENSG00000213024	3	BP	0.0715021751407101
GO:0009132	nucleoside diphosphate metabolic process	3/40	158/21081	0.00333042450750456	0.0648675864302593	0.0516295473890659	ENSG00000181192/ENSG00000139496/ENSG00000213024	3	BP	0.0715021751407101
GO:0043467	regulation of generation of precursor metabolites and energy	3/40	165/21081	0.003761510441659	0.0700785749674297	0.0557770884712822	ENSG00000139496/ENSG00000256053/ENSG00000213024	3	BP	0.0775903722475543
GO:0051028	mRNA transport	3/40	165/21081	0.003761510441659	0.0700785749674297	0.0557770884712822	ENSG00000139496/ENSG00000213024/ENSG00000164609	3	BP	0.0775903722475543
GO:0016573	histone acetylation	3/40	167/21081	0.00389063947252566	0.0709420857011594	0.056464375771481	ENSG00000149554/ENSG00000163872/ENSG00000197181	3	BP	0.0787106293287884
GO:0007569	cell aging	3/40	171/21081	0.00415695985461178	0.0742190540708811	0.059072587407641	ENSG00000149554/ENSG00000132604/ENSG00000213024	3	BP	0.0825117314538035
GO:0007259	receptor signaling pathway via JAK-STAT	3/40	177/21081	0.00457684773150277	0.080048132773426	0.06371208012919	ENSG00000159110/ENSG00000249624/ENSG00000134086	3	BP	0.0891637743248318
GO:0061647	histone H3-K9 modification	2/40	56/21081	0.00506720005156235	0.0856695257317516	0.0681862711713751	ENSG00000149554/ENSG00000197181	2	BP	0.0948825026773173
GO:0018393	internal peptidyl-lysine acetylation	3/40	184/21081	0.00509818647878568	0.0856695257317516	0.0681862711713751	ENSG00000149554/ENSG00000163872/ENSG00000197181	3	BP	0.0948825026773173
GO:0035065	regulation of histone acetylation	2/40	57/21081	0.00524519019279977	0.0858832961496207	0.0683564157771347	ENSG00000149554/ENSG00000197181	2	BP	0.0948825026773173
GO:0097696	receptor signaling pathway via STAT	3/40	187/21081	0.00533214579183165	0.0858832961496207	0.0683564157771347	ENSG00000159110/ENSG00000249624/ENSG00000134086	3	BP	0.0948825026773173
GO:0006475	internal protein amino acid acetylation	3/40	188/21081	0.0054115495823565	0.0858832961496207	0.0683564157771347	ENSG00000149554/ENSG00000163872/ENSG00000197181	3	BP	0.0948825026773173
GO:0042306	regulation of protein import into nucleus	2/40	59/21081	0.00560971239456205	0.0874095185843577	0.0695711699842336	ENSG00000139496/ENSG00000213024	2	BP	0.0964460253320014
GO:0018394	peptidyl-lysine acetylation	3/40	192/21081	0.00573629912942517	0.0877858634628102	0.0698707112005171	ENSG00000149554/ENSG00000163872/ENSG00000197181	3	BP	0.0964460253320014
GO:0046605	regulation of centrosome cycle	2/40	62/21081	0.00617768738653	0.0899738026397689	0.0716121404048029	ENSG00000149554/ENSG00000213024	2	BP	0.0964460253320014
GO:0051353	positive regulation of oxidoreductase activity	2/40	62/21081	0.00617768738653	0.0899738026397689	0.0716121404048029	ENSG00000256053/ENSG00000132604	2	BP	0.0964460253320014
GO:1904589	regulation of protein import	2/40	63/21081	0.00637262020981446	0.0899738026397689	0.0716121404048029	ENSG00000139496/ENSG00000213024	2	BP	0.0964460253320014
GO:2000756	regulation of peptidyl-lysine acetylation	2/40	63/21081	0.00637262020981446	0.0899738026397689	0.0716121404048029	ENSG00000149554/ENSG00000197181	2	BP	0.0964460253320014
GO:0009408	response to heat	3/40	201/21081	0.00650918992259705	0.0899738026397689	0.0716121404048029	ENSG00000139496/ENSG00000213024/ENSG00000164609	3	BP	0.0964460253320014
GO:0051783	regulation of nuclear division	3/40	201/21081	0.00650918992259705	0.0899738026397689	0.0716121404048029	ENSG00000149554/ENSG00000213024/ENSG00000197181	3	BP	0.0964460253320014
GO:0075733	intracellular transport of virus	2/40	65/21081	0.0067708330076809	0.0920163068472387	0.0732378146987787	ENSG00000139496/ENSG00000213024	2	BP	0.0989293933900043
GO:0006611	protein export from nucleus	3/40	205/21081	0.00687169619395948	0.0920163068472387	0.0732378146987787	ENSG00000139496/ENSG00000213024/ENSG00000164609	3	BP	0.0990277314526763
GO:0016052	carbohydrate catabolic process	3/40	214/21081	0.00773074285513451	0.101926871182312	0.0811258521478083	ENSG00000181192/ENSG00000139496/ENSG00000213024	3	BP	0.109901911940561
GO:0001959	regulation of cytokine-mediated signaling pathway	3/40	216/21081	0.00792988355339049	0.102649478882223	0.0817009916055769	ENSG00000012504/ENSG00000159110/ENSG00000249624	3	BP	0.111229833308891
GO:0046794	transport of virus	2/40	72/21081	0.0082511024652844	0.102649478882223	0.0817009916055769	ENSG00000139496/ENSG00000213024	2	BP	0.112342813007315
GO:0009150	purine ribonucleotide metabolic process	4/40	426/21081	0.00846215961438403	0.102649478882223	0.0817009916055769	ENSG00000181192/ENSG00000152402/ENSG00000139496/ENSG00000213024	4	BP	0.112342813007315
GO:0051785	positive regulation of nuclear division	2/40	73/21081	0.00847341556634052	0.102649478882223	0.0817009916055769	ENSG00000213024/ENSG00000197181	2	BP	0.112342813007315
GO:1901605	alpha-amino acid metabolic process	3/40	222/21081	0.00854547221121852	0.102649478882223	0.0817009916055769	ENSG00000012504/ENSG00000104951/ENSG00000164300	3	BP	0.112342813007315
GO:0044766	multi-organism transport	2/40	74/21081	0.00869840863659135	0.102649478882223	0.0817009916055769	ENSG00000139496/ENSG00000213024	2	BP	0.112342813007315
GO:1902579	multi-organism localization	2/40	74/21081	0.00869840863659135	0.102649478882223	0.0817009916055769	ENSG00000139496/ENSG00000213024	2	BP	0.112342813007315
GO:0006473	protein acetylation	3/40	225/21081	0.00886354893498774	0.102649478882223	0.0817009916055769	ENSG00000149554/ENSG00000163872/ENSG00000197181	3	BP	0.112342813007315
GO:0051168	nuclear export	3/40	225/21081	0.00886354893498774	0.102649478882223	0.0817009916055769	ENSG00000139496/ENSG00000213024/ENSG00000164609	3	BP	0.112342813007315
GO:1901983	regulation of protein acetylation	2/40	77/21081	0.00938936338104306	0.106041926112064	0.0844011154217494	ENSG00000149554/ENSG00000197181	2	BP	0.11645051627622
GO:0060759	regulation of response to cytokine stimulus	3/40	230/21081	0.00940902460406723	0.106041926112064	0.0844011154217494	ENSG00000012504/ENSG00000159110/ENSG00000249624	3	BP	0.11645051627622
GO:0009259	ribonucleotide metabolic process	4/40	441/21081	0.00952768764367434	0.106041926112064	0.0844011154217494	ENSG00000181192/ENSG00000152402/ENSG00000139496/ENSG00000213024	4	BP	0.116547993036574
GO:0006110	regulation of glycolytic process	2/40	81/21081	0.0103475256665413	0.109638376077313	0.0872636095290776	ENSG00000139496/ENSG00000213024	2	BP	0.121126738004667
GO:0016925	protein sumoylation	2/40	81/21081	0.0103475256665413	0.109638376077313	0.0872636095290776	ENSG00000139496/ENSG00000213024	2	BP	0.121126738004667
GO:0071260	cellular response to mechanical stimulus	2/40	81/21081	0.0103475256665413	0.109638376077313	0.0872636095290776	ENSG00000149554/ENSG00000120889	2	BP	0.121126738004667
GO:0019693	ribose phosphate metabolic process	4/40	452/21081	0.010362553631578	0.109638376077313	0.0872636095290776	ENSG00000181192/ENSG00000152402/ENSG00000139496/ENSG00000213024	4	BP	0.121126738004667
GO:0006163	purine nucleotide metabolic process	4/40	466/21081	0.0114922789478607	0.118384248020185	0.0942246425315727	ENSG00000181192/ENSG00000152402/ENSG00000139496/ENSG00000213024	4	BP	0.129861456702596
GO:0006305	DNA alkylation	2/40	86/21081	0.0116035902376844	0.118384248020185	0.0942246425315727	ENSG00000143194/ENSG00000197181	2	BP	0.129861456702596
GO:0006306	DNA methylation	2/40	86/21081	0.0116035902376844	0.118384248020185	0.0942246425315727	ENSG00000143194/ENSG00000197181	2	BP	0.129861456702596
GO:0000280	nuclear division	4/40	469/21081	0.0117443191180447	0.118410370401933	0.0942454339132259	ENSG00000143194/ENSG00000149554/ENSG00000213024/ENSG00000197181	4	BP	0.130052881180874
GO:0043470	regulation of carbohydrate catabolic process	2/40	92/21081	0.0131947903022742	0.131487619640105	0.104653905947046	ENSG00000139496/ENSG00000213024	2	BP	0.144592910395755
GO:0072521	purine-containing compound metabolic process	4/40	497/21081	0.0142705072487871	0.138045915576309	0.109873798800526	ENSG00000181192/ENSG00000152402/ENSG00000139496/ENSG00000213024	4	BP	0.150816370870229
GO:1900034	regulation of cellular response to heat	2/40	96/21081	0.0143054506419577	0.138045915576309	0.109873798800526	ENSG00000139496/ENSG00000213024	2	BP	0.150816370870229
GO:0009266	response to temperature stimulus	3/40	269/21081	0.0143361569268279	0.138045915576309	0.109873798800526	ENSG00000139496/ENSG00000213024/ENSG00000164609	3	BP	0.150816370870229
GO:0043543	protein acylation	3/40	271/21081	0.0146215137858263	0.139229303493924	0.11081568342942	ENSG00000149554/ENSG00000163872/ENSG00000197181	3	BP	0.152295371313755
GO:0006890	retrograde vesicle-mediated transport, Golgi to endoplasmic reticulum	2/40	98/21081	0.0148755012238268	0.140091258778237	0.111501732713011	ENSG00000122218/ENSG00000126214	2	BP	0.153421836151626
GO:0006260	DNA replication	3/40	288/21081	0.0171779011742988	0.15754617458266	0.125394486433168	ENSG00000149554/ENSG00000132604/ENSG00000125482	3	BP	0.166749387109508
GO:0043122	regulation of I-kappaB kinase/NF-kappaB signaling	3/40	289/21081	0.0173355990503224	0.15754617458266	0.125394486433168	ENSG00000012504/ENSG00000213024/ENSG00000120889	3	BP	0.166749387109508
GO:0051607	defense response to virus	3/40	298/21081	0.0187916597089334	0.15754617458266	0.125394486433168	ENSG00000159110/ENSG00000249624/ENSG00000164300	3	BP	0.166749387109508
GO:0000018	regulation of DNA recombination	2/40	111/21081	0.0188140249216498	0.15754617458266	0.125394486433168	ENSG00000149554/ENSG00000132604	2	BP	0.166749387109508
GO:0044728	DNA methylation or demethylation	2/40	111/21081	0.0188140249216498	0.15754617458266	0.125394486433168	ENSG00000143194/ENSG00000197181	2	BP	0.166749387109508
GO:0010749	regulation of nitric oxide mediated signal transduction	1/40	10/21081	0.0188172187901071	0.15754617458266	0.125394486433168	ENSG00000152402	1	BP	0.166749387109508
GO:0021859	pyramidal neuron differentiation	1/40	10/21081	0.0188172187901071	0.15754617458266	0.125394486433168	ENSG00000170390	1	BP	0.166749387109508
GO:0031848	protection from non-homologous end joining at telomere	1/40	10/21081	0.0188172187901071	0.15754617458266	0.125394486433168	ENSG00000132604	1	BP	0.166749387109508
GO:0034454	microtubule anchoring at centrosome	1/40	10/21081	0.0188172187901071	0.15754617458266	0.125394486433168	ENSG00000147144	1	BP	0.166749387109508
GO:0060631	regulation of meiosis I	1/40	10/21081	0.0188172187901071	0.15754617458266	0.125394486433168	ENSG00000197181	1	BP	0.166749387109508
GO:0099641	anterograde axonal protein transport	1/40	10/21081	0.0188172187901071	0.15754617458266	0.125394486433168	ENSG00000132604	1	BP	0.166749387109508
GO:0034504	protein localization to nucleus	3/40	303/21081	0.0196292464457201	0.15754617458266	0.125394486433168	ENSG00000139496/ENSG00000213024/ENSG00000170390	3	BP	0.166749387109508
GO:0046822	regulation of nucleocytoplasmic transport	2/40	116/21081	0.0204335970286306	0.15754617458266	0.125394486433168	ENSG00000139496/ENSG00000213024	2	BP	0.166749387109508
GO:0006182	cGMP biosynthetic process	1/40	11/21081	0.0206798409365834	0.15754617458266	0.125394486433168	ENSG00000152402	1	BP	0.166749387109508
GO:0034969	histone arginine methylation	1/40	11/21081	0.0206798409365834	0.15754617458266	0.125394486433168	ENSG00000012504	1	BP	0.166749387109508
GO:0046607	positive regulation of centrosome cycle	1/40	11/21081	0.0206798409365834	0.15754617458266	0.125394486433168	ENSG00000213024	1	BP	0.166749387109508
GO:0048742	regulation of skeletal muscle fiber development	1/40	11/21081	0.0206798409365834	0.15754617458266	0.125394486433168	ENSG00000163380	1	BP	0.166749387109508
GO:0090657	telomeric loop disassembly	1/40	11/21081	0.0206798409365834	0.15754617458266	0.125394486433168	ENSG00000132604	1	BP	0.166749387109508
GO:0099612	protein localization to axon	1/40	11/21081	0.0206798409365834	0.15754617458266	0.125394486433168	ENSG00000122218	1	BP	0.166749387109508
GO:1904779	regulation of protein localization to centrosome	1/40	11/21081	0.0206798409365834	0.15754617458266	0.125394486433168	ENSG00000213024	1	BP	0.166749387109508
GO:0008654	phospholipid biosynthetic process	3/40	317/21081	0.0220837271655572	0.15754617458266	0.125394486433168	ENSG00000012504/ENSG00000143797/ENSG00000164300	3	BP	0.166749387109508
GO:1900542	regulation of purine nucleotide metabolic process	2/40	121/21081	0.0221095621586992	0.15754617458266	0.125394486433168	ENSG00000139496/ENSG00000213024	2	BP	0.166749387109508
GO:0000012	single strand break repair	1/40	12/21081	0.0225390154198557	0.15754617458266	0.125394486433168	ENSG00000132604	1	BP	0.166749387109508
GO:0006558	L-phenylalanine metabolic process	1/40	12/21081	0.0225390154198557	0.15754617458266	0.125394486433168	ENSG00000104951	1	BP	0.166749387109508
GO:0006559	L-phenylalanine catabolic process	1/40	12/21081	0.0225390154198557	0.15754617458266	0.125394486433168	ENSG00000104951	1	BP	0.166749387109508
GO:0006563	L-serine metabolic process	1/40	12/21081	0.0225390154198557	0.15754617458266	0.125394486433168	ENSG00000164300	1	BP	0.166749387109508
GO:0071073	positive regulation of phospholipid biosynthetic process	1/40	12/21081	0.0225390154198557	0.15754617458266	0.125394486433168	ENSG00000012504	1	BP	0.166749387109508
GO:0072393	microtubule anchoring at microtubule organizing center	1/40	12/21081	0.0225390154198557	0.15754617458266	0.125394486433168	ENSG00000147144	1	BP	0.166749387109508
GO:1902221	erythrose 4-phosphate/phosphoenolpyruvate family amino acid metabolic process	1/40	12/21081	0.0225390154198557	0.15754617458266	0.125394486433168	ENSG00000104951	1	BP	0.166749387109508
GO:1902222	erythrose 4-phosphate/phosphoenolpyruvate family amino acid catabolic process	1/40	12/21081	0.0225390154198557	0.15754617458266	0.125394486433168	ENSG00000104951	1	BP	0.166749387109508
GO:1905383	protein localization to presynapse	1/40	12/21081	0.0225390154198557	0.15754617458266	0.125394486433168	ENSG00000132604	1	BP	0.166749387109508
GO:0006140	regulation of nucleotide metabolic process	2/40	123/21081	0.0227954791694863	0.15754617458266	0.125394486433168	ENSG00000139496/ENSG00000213024	2	BP	0.166749387109508
GO:0006275	regulation of DNA replication	2/40	123/21081	0.0227954791694863	0.15754617458266	0.125394486433168	ENSG00000132604/ENSG00000125482	2	BP	0.166749387109508
GO:0097193	intrinsic apoptotic signaling pathway	3/40	322/21081	0.0229994050408527	0.157683920960086	0.125504121822927	ENSG00000143194/ENSG00000256053/ENSG00000120889	3	BP	0.166749387109508
GO:1903578	regulation of ATP metabolic process	2/40	126/21081	0.0238407660531474	0.157915533012829	0.125688466980671	ENSG00000139496/ENSG00000213024	2	BP	0.166749387109508
GO:0000722	telomere maintenance via recombination	1/40	13/21081	0.0243947484581206	0.157915533012829	0.125688466980671	ENSG00000132604	1	BP	0.166749387109508
GO:0030157	pancreatic juice secretion	1/40	13/21081	0.0243947484581206	0.157915533012829	0.125688466980671	ENSG00000122218	1	BP	0.166749387109508
GO:0036462	TRAIL-activated apoptotic signaling pathway	1/40	13/21081	0.0243947484581206	0.157915533012829	0.125688466980671	ENSG00000120889	1	BP	0.166749387109508
GO:0043247	telomere maintenance in response to DNA damage	1/40	13/21081	0.0243947484581206	0.157915533012829	0.125688466980671	ENSG00000132604	1	BP	0.166749387109508
GO:0048096	chromatin-mediated maintenance of transcription	1/40	13/21081	0.0243947484581206	0.157915533012829	0.125688466980671	ENSG00000149554	1	BP	0.166749387109508
GO:0070857	regulation of bile acid biosynthetic process	1/40	13/21081	0.0243947484581206	0.157915533012829	0.125688466980671	ENSG00000012504	1	BP	0.166749387109508
GO:0007249	I-kappaB kinase/NF-kappaB signaling	3/40	330/21081	0.0245073114243947	0.157915533012829	0.125688466980671	ENSG00000012504/ENSG00000213024/ENSG00000120889	3	BP	0.166749387109508
GO:0051341	regulation of oxidoreductase activity	2/40	131/21081	0.0256260702796439	0.159058524278709	0.126598199020578	ENSG00000256053/ENSG00000132604	2	BP	0.166749387109508
GO:0019627	urea metabolic process	1/40	14/21081	0.0262470462586554	0.159058524278709	0.126598199020578	ENSG00000012504	1	BP	0.166749387109508
GO:0044154	histone H3-K14 acetylation	1/40	14/21081	0.0262470462586554	0.159058524278709	0.126598199020578	ENSG00000197181	1	BP	0.166749387109508
GO:0071941	nitrogen cycle metabolic process	1/40	14/21081	0.0262470462586554	0.159058524278709	0.126598199020578	ENSG00000012504	1	BP	0.166749387109508
GO:0072425	signal transduction involved in G2 DNA damage checkpoint	1/40	14/21081	0.0262470462586554	0.159058524278709	0.126598199020578	ENSG00000149554	1	BP	0.166749387109508
GO:0090399	replicative senescence	1/40	14/21081	0.0262470462586554	0.159058524278709	0.126598199020578	ENSG00000149554	1	BP	0.166749387109508
GO:0099640	axo-dendritic protein transport	1/40	14/21081	0.0262470462586554	0.159058524278709	0.126598199020578	ENSG00000132604	1	BP	0.166749387109508
GO:0006304	DNA modification	2/40	133/21081	0.0263550880368455	0.159058524278709	0.126598199020578	ENSG00000143194/ENSG00000197181	2	BP	0.166749387109508
GO:0007098	centrosome cycle	2/40	133/21081	0.0263550880368455	0.159058524278709	0.126598199020578	ENSG00000149554/ENSG00000213024	2	BP	0.166749387109508
GO:0046034	ATP metabolic process	3/40	342/21081	0.0268679882325298	0.159076395875069	0.126612423419572	ENSG00000181192/ENSG00000139496/ENSG00000213024	3	BP	0.166749387109508
GO:0007127	meiosis I	2/40	135/21081	0.0270925108641108	0.159076395875069	0.126612423419572	ENSG00000143194/ENSG00000197181	2	BP	0.166749387109508
GO:0043414	macromolecule methylation	3/40	345/21081	0.0274766743023682	0.159076395875069	0.126612423419572	ENSG00000143194/ENSG00000012504/ENSG00000197181	3	BP	0.166749387109508
GO:0006282	regulation of DNA repair	2/40	137/21081	0.0278382679918517	0.159076395875069	0.126612423419572	ENSG00000149554/ENSG00000132604	2	BP	0.166749387109508
GO:0001325	formation of extrachromosomal circular DNA	1/40	15/21081	0.028095915017836	0.159076395875069	0.126612423419572	ENSG00000132604	1	BP	0.166749387109508
GO:0018216	peptidyl-arginine methylation	1/40	15/21081	0.028095915017836	0.159076395875069	0.126612423419572	ENSG00000012504	1	BP	0.166749387109508
GO:0042754	negative regulation of circadian rhythm	1/40	15/21081	0.028095915017836	0.159076395875069	0.126612423419572	ENSG00000197181	1	BP	0.166749387109508
GO:0090656	t-circle formation	1/40	15/21081	0.028095915017836	0.159076395875069	0.126612423419572	ENSG00000132604	1	BP	0.166749387109508
GO:0090737	telomere maintenance via telomere trimming	1/40	15/21081	0.028095915017836	0.159076395875069	0.126612423419572	ENSG00000132604	1	BP	0.166749387109508
GO:0043618	regulation of transcription from RNA polymerase II promoter in response to stress	2/40	138/21081	0.0282142499101638	0.159076395875069	0.126612423419572	ENSG00000149554/ENSG00000134086	2	BP	0.166749387109508
GO:0071496	cellular response to external stimulus	3/40	350/21081	0.0285075935212403	0.159679788547078	0.127092676998718	ENSG00000149554/ENSG00000012504/ENSG00000120889	3	BP	0.167196972589817
GO:0007059	chromosome segregation	3/40	352/21081	0.0289257119879722	0.160969708920079	0.128119353166138	ENSG00000143194/ENSG00000213024/ENSG00000123485	3	BP	0.167196972589817
GO:0061982	meiosis I cell cycle process	2/40	141/21081	0.0293545040289736	0.16230199969568	0.129179752874532	ENSG00000143194/ENSG00000197181	2	BP	0.168748296385138
GO:0045836	positive regulation of meiotic nuclear division	1/40	16/21081	0.0299413609211535	0.16310398414822	0.129818070046117	ENSG00000197181	1	BP	0.168869325407493
GO:0060337	type I interferon signaling pathway	2/40	143/21081	0.0301248433522457	0.16310398414822	0.129818070046117	ENSG00000159110/ENSG00000249624	2	BP	0.168869325407493
GO:0071357	cellular response to type I interferon	2/40	143/21081	0.0301248433522457	0.16310398414822	0.129818070046117	ENSG00000159110/ENSG00000249624	2	BP	0.168869325407493
GO:0031023	microtubule organizing center organization	2/40	144/21081	0.0305130379963243	0.16310398414822	0.129818070046117	ENSG00000149554/ENSG00000213024	2	BP	0.168869325407493
GO:0043620	regulation of DNA-templated transcription in response to stress	2/40	145/21081	0.0309032378001281	0.16310398414822	0.129818070046117	ENSG00000149554/ENSG00000134086	2	BP	0.168869325407493
GO:0034340	response to type I interferon	2/40	147/21081	0.0316896185451569	0.16310398414822	0.129818070046117	ENSG00000159110/ENSG00000249624	2	BP	0.168869325407493
GO:0007250	activation of NF-kappaB-inducing kinase activity	1/40	17/21081	0.0317833901432354	0.16310398414822	0.129818070046117	ENSG00000120889	1	BP	0.168869325407493
GO:0032682	negative regulation of chemokine production	1/40	17/21081	0.0317833901432354	0.16310398414822	0.129818070046117	ENSG00000012504	1	BP	0.168869325407493
GO:0033262	regulation of nuclear cell cycle DNA replication	1/40	17/21081	0.0317833901432354	0.16310398414822	0.129818070046117	ENSG00000132604	1	BP	0.168869325407493
GO:0046068	cGMP metabolic process	1/40	17/21081	0.0317833901432354	0.16310398414822	0.129818070046117	ENSG00000152402	1	BP	0.168869325407493
GO:0097201	negative regulation of transcription from RNA polymerase II promoter in response to stress	1/40	17/21081	0.0317833901432354	0.16310398414822	0.129818070046117	ENSG00000134086	1	BP	0.168869325407493
GO:1904251	regulation of bile acid metabolic process	1/40	17/21081	0.0317833901432354	0.16310398414822	0.129818070046117	ENSG00000012504	1	BP	0.168869325407493
GO:0055089	fatty acid homeostasis	1/40	18/21081	0.0336220088478627	0.171512271325109	0.136510411863503	ENSG00000012504	1	BP	0.174846577064628
GO:0009070	serine family amino acid biosynthetic process	1/40	19/21081	0.0354572231879894	0.178746119247688	0.142267991491128	ENSG00000164300	1	BP	0.18107280967847
GO:2000104	negative regulation of DNA-dependent DNA replication	1/40	19/21081	0.0354572231879894	0.178746119247688	0.142267991491128	ENSG00000132604	1	BP	0.18107280967847
GO:0006606	protein import into nucleus	2/40	157/21081	0.0357389344744807	0.179112671606023	0.142559738623967	ENSG00000139496/ENSG00000213024	2	BP	0.181629753947602
GO:0006913	nucleocytoplasmic transport	3/40	386/21081	0.0365343026431791	0.180982065694824	0.144047630744022	ENSG00000139496/ENSG00000213024/ENSG00000164609	3	BP	0.183895150146528
GO:0007568	aging	3/40	386/21081	0.0365343026431791	0.180982065694824	0.144047630744022	ENSG00000149554/ENSG00000132604/ENSG00000213024	3	BP	0.183895150146528
GO:0033044	regulation of chromosome organization	3/40	389/21081	0.0372507926482059	0.182422453140071	0.145194066983684	ENSG00000149554/ENSG00000132604/ENSG00000197181	3	BP	0.185724331118069
GO:0051169	nuclear transport	3/40	389/21081	0.0372507926482059	0.182422453140071	0.145194066983684	ENSG00000139496/ENSG00000213024/ENSG00000164609	3	BP	0.185724331118069
GO:0006520	cellular amino acid metabolic process	3/40	393/21081	0.0382174183719424	0.183189432109163	0.145804522516413	ENSG00000012504/ENSG00000104951/ENSG00000164300	3	BP	0.18790671883936
GO:0031056	regulation of histone modification	2/40	163/21081	0.0382600374638706	0.183189432109163	0.145804522516413	ENSG00000149554/ENSG00000197181	2	BP	0.18790671883936
GO:0046394	carboxylic acid biosynthetic process	3/40	395/21081	0.0387055674742133	0.183189432109163	0.145804522516413	ENSG00000012504/ENSG00000115425/ENSG00000164300	3	BP	0.18790671883936
GO:0016053	organic acid biosynthetic process	3/40	396/21081	0.0389508492636316	0.183189432109163	0.145804522516413	ENSG00000012504/ENSG00000115425/ENSG00000164300	3	BP	0.18790671883936
GO:0022412	cellular process involved in reproduction in multicellular organism	3/40	396/21081	0.0389508492636316	0.183189432109163	0.145804522516413	ENSG00000143194/ENSG00000163596/ENSG00000197181	3	BP	0.18790671883936
GO:0010988	regulation of low-density lipoprotein particle clearance	1/40	21/21081	0.0391174633325283	0.183189432109163	0.145804522516413	ENSG00000012504	1	BP	0.18790671883936
GO:0071071	regulation of phospholipid biosynthetic process	1/40	21/21081	0.0391174633325283	0.183189432109163	0.145804522516413	ENSG00000012504	1	BP	0.18790671883936
GO:2000696	regulation of epithelial cell differentiation involved in kidney development	1/40	21/21081	0.0391174633325283	0.183189432109163	0.145804522516413	ENSG00000183943	1	BP	0.18790671883936
GO:0006650	glycerophospholipid metabolic process	3/40	398/21081	0.0394438246417735	0.183713900641304	0.146221958626254	ENSG00000012504/ENSG00000143797/ENSG00000164300	3	BP	0.188613197832481
GO:0009615	response to virus	3/40	399/21081	0.039691517139892	0.183868271291283	0.14634482564239	ENSG00000159110/ENSG00000249624/ENSG00000164300	3	BP	0.18862007987644
GO:0032259	methylation	3/40	400/21081	0.0399400121061081	0.184024679435133	0.146469314344981	ENSG00000143194/ENSG00000012504/ENSG00000197181	3	BP	0.18862007987644
GO:0006312	mitotic recombination	1/40	22/21081	0.0409425013888766	0.18763488604421	0.14934275766953	ENSG00000132604	1	BP	0.192283533308474
GO:0048193	Golgi vesicle transport	3/40	407/21081	0.0417018979998383	0.189890594632285	0.151138126047682	ENSG00000122218/ENSG00000126214/ENSG00000108433	3	BP	0.194608842771263
GO:0006541	glutamine metabolic process	1/40	23/21081	0.0427641595846335	0.189890594632285	0.151138126047682	ENSG00000012504	1	BP	0.194608842771263
GO:0009190	cyclic nucleotide biosynthetic process	1/40	23/21081	0.0427641595846335	0.189890594632285	0.151138126047682	ENSG00000152402	1	BP	0.194608842771263
GO:0032211	negative regulation of telomere maintenance via telomerase	1/40	23/21081	0.0427641595846335	0.189890594632285	0.151138126047682	ENSG00000132604	1	BP	0.194608842771263
GO:0033617	mitochondrial cytochrome c oxidase assembly	1/40	23/21081	0.0427641595846335	0.189890594632285	0.151138126047682	ENSG00000256053	1	BP	0.194608842771263
GO:0052652	cyclic purine nucleotide metabolic process	1/40	23/21081	0.0427641595846335	0.189890594632285	0.151138126047682	ENSG00000152402	1	BP	0.194608842771263
GO:0007088	regulation of mitotic nuclear division	2/40	174/21081	0.0430534018351582	0.190085345891495	0.151293132884221	ENSG00000149554/ENSG00000213024	2	BP	0.194608842771263
GO:0006896	Golgi to vacuole transport	1/40	24/21081	0.044582444018892	0.190085345891495	0.151293132884221	ENSG00000108433	1	BP	0.194608842771263
GO:0046599	regulation of centriole replication	1/40	24/21081	0.044582444018892	0.190085345891495	0.151293132884221	ENSG00000213024	1	BP	0.194608842771263
GO:0046628	positive regulation of insulin receptor signaling pathway	1/40	24/21081	0.044582444018892	0.190085345891495	0.151293132884221	ENSG00000012504	1	BP	0.194608842771263
GO:0071605	monocyte chemotactic protein-1 production	1/40	24/21081	0.044582444018892	0.190085345891495	0.151293132884221	ENSG00000012504	1	BP	0.194608842771263
GO:0071637	regulation of monocyte chemotactic protein-1 production	1/40	24/21081	0.044582444018892	0.190085345891495	0.151293132884221	ENSG00000012504	1	BP	0.194608842771263
GO:1902410	mitotic cytokinetic process	1/40	24/21081	0.044582444018892	0.190085345891495	0.151293132884221	ENSG00000213024	1	BP	0.194608842771263
GO:2000773	negative regulation of cellular senescence	1/40	24/21081	0.044582444018892	0.190085345891495	0.151293132884221	ENSG00000132604	1	BP	0.194608842771263
GO:0051170	import into nucleus	2/40	181/21081	0.0462151288348262	0.195874572357065	0.155900906328537	ENSG00000139496/ENSG00000213024	2	BP	0.199682922702153
GO:0010155	regulation of proton transport	1/40	25/21081	0.0463973607800283	0.195874572357065	0.155900906328537	ENSG00000256053	1	BP	0.199682922702153
GO:0010528	regulation of transposition	1/40	26/21081	0.0482089159457197	0.19863000464174	0.158094015854385	ENSG00000197181	1	BP	0.202863118299589
GO:0010529	negative regulation of transposition	1/40	26/21081	0.0482089159457197	0.19863000464174	0.158094015854385	ENSG00000197181	1	BP	0.202863118299589
GO:0010804	negative regulation of tumor necrosis factor-mediated signaling pathway	1/40	26/21081	0.0482089159457197	0.19863000464174	0.158094015854385	ENSG00000012504	1	BP	0.202863118299589
GO:0032069	regulation of nuclease activity	1/40	26/21081	0.0482089159457197	0.19863000464174	0.158094015854385	ENSG00000132604	1	BP	0.202863118299589
GO:0051446	positive regulation of meiotic cell cycle	1/40	26/21081	0.0482089159457197	0.19863000464174	0.158094015854385	ENSG00000197181	1	BP	0.202863118299589
GO:0045787	positive regulation of cell cycle	3/40	433/21081	0.0485865292386726	0.199228017021734	0.158569987140065	ENSG00000149554/ENSG00000213024/ENSG00000197181	3	BP	0.203637564777225
GO:0008535	respiratory chain complex IV assembly	1/40	27/21081	0.0500171155829633	0.201242573026289	0.16017341684092	ENSG00000256053	1	BP	0.20473932137462
GO:0034453	microtubule anchoring	1/40	27/21081	0.0500171155829633	0.201242573026289	0.16017341684092	ENSG00000147144	1	BP	0.20473932137462
GO:0036152	phosphatidylethanolamine acyl-chain remodeling	1/40	27/21081	0.0500171155829633	0.201242573026289	0.16017341684092	ENSG00000143797	1	BP	0.20473932137462
GO:1900078	positive regulation of cellular response to insulin stimulus	1/40	27/21081	0.0500171155829633	0.201242573026289	0.16017341684092	ENSG00000012504	1	BP	0.20473932137462
GO:0021884	forebrain neuron development	1/40	28/21081	0.0518219657480949	0.202791893361267	0.161406555177917	ENSG00000170390	1	BP	0.206502681693166
GO:0032201	telomere maintenance via semi-conservative replication	1/40	28/21081	0.0518219657480949	0.202791893361267	0.161406555177917	ENSG00000132604	1	BP	0.206502681693166
GO:0034162	toll-like receptor 9 signaling pathway	1/40	28/21081	0.0518219657480949	0.202791893361267	0.161406555177917	ENSG00000012504	1	BP	0.206502681693166
GO:0046426	negative regulation of receptor signaling pathway via JAK-STAT	1/40	28/21081	0.0518219657480949	0.202791893361267	0.161406555177917	ENSG00000134086	1	BP	0.206502681693166
GO:0051000	positive regulation of nitric-oxide synthase activity	1/40	28/21081	0.0518219657480949	0.202791893361267	0.161406555177917	ENSG00000132604	1	BP	0.206502681693166
GO:1904353	regulation of telomere capping	1/40	28/21081	0.0518219657480949	0.202791893361267	0.161406555177917	ENSG00000132604	1	BP	0.206502681693166
GO:0010639	negative regulation of organelle organization	3/40	449/21081	0.0530860648541235	0.20679435263629	0.164592201078814	ENSG00000149554/ENSG00000132604/ENSG00000163380	3	BP	0.207607956232483
GO:0140013	meiotic nuclear division	2/40	197/21081	0.0537510311656663	0.208437256601701	0.165899824698032	ENSG00000143194/ENSG00000197181	2	BP	0.209429943652892
GO:0071577	zinc ion transmembrane transport	1/40	30/21081	0.0554216418341611	0.213193579135345	0.169685487047477	ENSG00000152683	1	BP	0.212012971671045
GO:0000966	RNA 5'-end processing	1/40	31/21081	0.05721647981462	0.213193579135345	0.169685487047477	ENSG00000197181	1	BP	0.21269164934622
GO:0009074	aromatic amino acid family catabolic process	1/40	31/21081	0.05721647981462	0.213193579135345	0.169685487047477	ENSG00000104951	1	BP	0.21269164934622
GO:0015721	bile acid and bile salt transport	1/40	31/21081	0.05721647981462	0.213193579135345	0.169685487047477	ENSG00000012504	1	BP	0.21269164934622
GO:0018195	peptidyl-arginine modification	1/40	31/21081	0.05721647981462	0.213193579135345	0.169685487047477	ENSG00000012504	1	BP	0.21269164934622
GO:0032196	transposition	1/40	31/21081	0.05721647981462	0.213193579135345	0.169685487047477	ENSG00000197181	1	BP	0.21269164934622
GO:0032703	negative regulation of interleukin-2 production	1/40	31/21081	0.05721647981462	0.213193579135345	0.169685487047477	ENSG00000012504	1	BP	0.21269164934622
GO:0036151	phosphatidylcholine acyl-chain remodeling	1/40	31/21081	0.05721647981462	0.213193579135345	0.169685487047477	ENSG00000143797	1	BP	0.21269164934622
GO:1904357	negative regulation of telomere maintenance via telomere lengthening	1/40	31/21081	0.05721647981462	0.213193579135345	0.169685487047477	ENSG00000132604	1	BP	0.21269164934622
GO:0035066	positive regulation of histone acetylation	1/40	32/21081	0.0590079924420504	0.217629100409102	0.17321581657569	ENSG00000197181	1	BP	0.216883198321173
GO:0090344	negative regulation of cell aging	1/40	32/21081	0.0590079924420504	0.217629100409102	0.17321581657569	ENSG00000132604	1	BP	0.216883198321173
GO:1902275	regulation of chromatin organization	2/40	208/21081	0.0591687052454151	0.217629100409102	0.17321581657569	ENSG00000149554/ENSG00000197181	2	BP	0.216883198321173
GO:0017038	protein import	2/40	210/21081	0.0601735359882097	0.219362304568563	0.174595312117458	ENSG00000139496/ENSG00000213024	2	BP	0.219177771409581
GO:0048741	skeletal muscle fiber development	1/40	33/21081	0.0607961857197508	0.219362304568563	0.174595312117458	ENSG00000163380	1	BP	0.219177771409581
GO:0071539	protein localization to centrosome	1/40	33/21081	0.0607961857197508	0.219362304568563	0.174595312117458	ENSG00000213024	1	BP	0.219177771409581
GO:1903046	meiotic cell cycle process	2/40	213/21081	0.0616919166901319	0.219362304568563	0.174595312117458	ENSG00000143194/ENSG00000197181	2	BP	0.219177771409581
GO:0009612	response to mechanical stimulus	2/40	214/21081	0.0622009843678206	0.219362304568563	0.174595312117458	ENSG00000149554/ENSG00000120889	2	BP	0.219177771409581
GO:0006099	tricarboxylic acid cycle	1/40	34/21081	0.062581065640466	0.219362304568563	0.174595312117458	ENSG00000181192	1	BP	0.219177771409581
GO:0006829	zinc ion transport	1/40	34/21081	0.062581065640466	0.219362304568563	0.174595312117458	ENSG00000152683	1	BP	0.219177771409581
GO:0010984	regulation of lipoprotein particle clearance	1/40	34/21081	0.062581065640466	0.219362304568563	0.174595312117458	ENSG00000012504	1	BP	0.219177771409581
GO:0048643	positive regulation of skeletal muscle tissue development	1/40	34/21081	0.062581065640466	0.219362304568563	0.174595312117458	ENSG00000163380	1	BP	0.219177771409581
GO:0070198	protein localization to chromosome, telomeric region	1/40	34/21081	0.062581065640466	0.219362304568563	0.174595312117458	ENSG00000132604	1	BP	0.219177771409581
GO:1904893	negative regulation of receptor signaling pathway via STAT	1/40	34/21081	0.062581065640466	0.219362304568563	0.174595312117458	ENSG00000134086	1	BP	0.219177771409581
GO:0070507	regulation of microtubule cytoskeleton organization	2/40	215/21081	0.0627115106409543	0.219362304568563	0.174595312117458	ENSG00000149554/ENSG00000213024	2	BP	0.219177771409581
GO:0006109	regulation of carbohydrate metabolic process	2/40	216/21081	0.0632234884642025	0.220254185422039	0.17530517982372	ENSG00000139496/ENSG00000213024	2	BP	0.219836023935385
GO:0043123	positive regulation of I-kappaB kinase/NF-kappaB signaling	2/40	218/21081	0.0642517706810552	0.220557123037242	0.175546294574873	ENSG00000213024/ENSG00000120889	2	BP	0.219836023935385
GO:0007263	nitric oxide mediated signal transduction	1/40	35/21081	0.0643626381864055	0.220557123037242	0.175546294574873	ENSG00000152402	1	BP	0.219836023935385
GO:1905508	protein localization to microtubule organizing center	1/40	35/21081	0.0643626381864055	0.220557123037242	0.175546294574873	ENSG00000213024	1	BP	0.219836023935385
GO:2000758	positive regulation of peptidyl-lysine acetylation	1/40	35/21081	0.0643626381864055	0.220557123037242	0.175546294574873	ENSG00000197181	1	BP	0.219836023935385
GO:0006888	endoplasmic reticulum to Golgi vesicle-mediated transport	2/40	219/21081	0.064768061085188	0.220557123037242	0.175546294574873	ENSG00000122218/ENSG00000108433	2	BP	0.220272067968669
GO:0050821	protein stabilization	2/40	220/21081	0.0652857750603954	0.220557123037242	0.175546294574873	ENSG00000256053/ENSG00000134086	2	BP	0.220272067968669
GO:0019083	viral transcription	2/40	221/21081	0.0658049056622468	0.220557123037242	0.175546294574873	ENSG00000139496/ENSG00000213024	2	BP	0.220272067968669
GO:0006536	glutamate metabolic process	1/40	36/21081	0.0661409093292609	0.220557123037242	0.175546294574873	ENSG00000012504	1	BP	0.220272067968669
GO:0014904	myotube cell development	1/40	36/21081	0.0661409093292609	0.220557123037242	0.175546294574873	ENSG00000163380	1	BP	0.220272067968669
GO:0040020	regulation of meiotic nuclear division	1/40	36/21081	0.0661409093292609	0.220557123037242	0.175546294574873	ENSG00000197181	1	BP	0.220272067968669
GO:0046486	glycerolipid metabolic process	3/40	492/21081	0.0661414009574926	0.220557123037242	0.175546294574873	ENSG00000012504/ENSG00000143797/ENSG00000164300	3	BP	0.220272067968669
GO:0062012	regulation of small molecule metabolic process	3/40	494/21081	0.0667819383435531	0.221829926978392	0.17655934739544	ENSG00000012504/ENSG00000139496/ENSG00000213024	3	BP	0.221623341127501
GO:0032770	positive regulation of monooxygenase activity	1/40	37/21081	0.0679158850302268	0.223861205657325	0.178176087042862	ENSG00000132604	1	BP	0.221886680285089
GO:0045742	positive regulation of epidermal growth factor receptor signaling pathway	1/40	37/21081	0.0679158850302268	0.223861205657325	0.178176087042862	ENSG00000213024	1	BP	0.221886680285089
GO:0017004	cytochrome complex assembly	1/40	38/21081	0.0696875712400158	0.227947513559899	0.181428469921777	ENSG00000256053	1	BP	0.225573307521528
GO:0045738	negative regulation of DNA repair	1/40	38/21081	0.0696875712400158	0.227947513559899	0.181428469921777	ENSG00000132604	1	BP	0.225573307521528
GO:0007099	centriole replication	1/40	39/21081	0.0714559738988764	0.229855244647168	0.18294687530721	ENSG00000213024	1	BP	0.228485363348383
GO:0032941	secretion by tissue	1/40	39/21081	0.0714559738988764	0.229855244647168	0.18294687530721	ENSG00000122218	1	BP	0.228485363348383
GO:0035774	positive regulation of insulin secretion involved in cellular response to glucose stimulus	1/40	39/21081	0.0714559738988764	0.229855244647168	0.18294687530721	ENSG00000012504	1	BP	0.228485363348383
GO:1901186	positive regulation of ERBB signaling pathway	1/40	39/21081	0.0714559738988764	0.229855244647168	0.18294687530721	ENSG00000213024	1	BP	0.228485363348383
GO:0006623	protein targeting to vacuole	1/40	40/21081	0.0732210989366123	0.229855244647168	0.18294687530721	ENSG00000108433	1	BP	0.229251774051536
GO:0006699	bile acid biosynthetic process	1/40	40/21081	0.0732210989366123	0.229855244647168	0.18294687530721	ENSG00000012504	1	BP	0.229251774051536
GO:0016572	histone phosphorylation	1/40	40/21081	0.0732210989366123	0.229855244647168	0.18294687530721	ENSG00000149554	1	BP	0.229251774051536
GO:0032205	negative regulation of telomere maintenance	1/40	40/21081	0.0732210989366123	0.229855244647168	0.18294687530721	ENSG00000132604	1	BP	0.229251774051536
GO:0032506	cytokinetic process	1/40	40/21081	0.0732210989366123	0.229855244647168	0.18294687530721	ENSG00000213024	1	BP	0.229251774051536
GO:0055090	acylglycerol homeostasis	1/40	40/21081	0.0732210989366123	0.229855244647168	0.18294687530721	ENSG00000012504	1	BP	0.229251774051536
GO:0070328	triglyceride homeostasis	1/40	40/21081	0.0732210989366123	0.229855244647168	0.18294687530721	ENSG00000012504	1	BP	0.229251774051536
GO:1902042	negative regulation of extrinsic apoptotic signaling pathway via death domain receptors	1/40	41/21081	0.0749829522726007	0.234048041359957	0.186284014986492	ENSG00000120889	1	BP	0.233329768457314
GO:0019080	viral gene expression	2/40	239/21081	0.0753837019442266	0.234048041359957	0.186284014986492	ENSG00000139496/ENSG00000213024	2	BP	0.233329768457314
GO:0006658	phosphatidylserine metabolic process	1/40	42/21081	0.0767415398158086	0.234048041359957	0.186284014986492	ENSG00000164300	1	BP	0.233329768457314
GO:0009187	cyclic nucleotide metabolic process	1/40	42/21081	0.0767415398158086	0.234048041359957	0.186284014986492	ENSG00000152402	1	BP	0.233329768457314
GO:0051693	actin filament capping	1/40	42/21081	0.0767415398158086	0.234048041359957	0.186284014986492	ENSG00000163380	1	BP	0.233329768457314
GO:0060236	regulation of mitotic spindle organization	1/40	42/21081	0.0767415398158086	0.234048041359957	0.186284014986492	ENSG00000213024	1	BP	0.233329768457314
GO:0098534	centriole assembly	1/40	42/21081	0.0767415398158086	0.234048041359957	0.186284014986492	ENSG00000213024	1	BP	0.233329768457314
GO:2000279	negative regulation of DNA biosynthetic process	1/40	42/21081	0.0767415398158086	0.234048041359957	0.186284014986492	ENSG00000132604	1	BP	0.233329768457314
GO:0009072	aromatic amino acid family metabolic process	1/40	43/21081	0.0784968674648115	0.234396569398409	0.186561416164305	ENSG00000104951	1	BP	0.2339340072889
GO:0031572	G2 DNA damage checkpoint	1/40	43/21081	0.0784968674648115	0.234396569398409	0.186561416164305	ENSG00000149554	1	BP	0.2339340072889
GO:0032467	positive regulation of cytokinesis	1/40	43/21081	0.0784968674648115	0.234396569398409	0.186561416164305	ENSG00000213024	1	BP	0.2339340072889
GO:0045910	negative regulation of DNA recombination	1/40	43/21081	0.0784968674648115	0.234396569398409	0.186561416164305	ENSG00000132604	1	BP	0.2339340072889
GO:1900181	negative regulation of protein localization to nucleus	1/40	43/21081	0.0784968674648115	0.234396569398409	0.186561416164305	ENSG00000170390	1	BP	0.2339340072889
GO:1903427	negative regulation of reactive oxygen species biosynthetic process	1/40	43/21081	0.0784968674648115	0.234396569398409	0.186561416164305	ENSG00000256053	1	BP	0.2339340072889
GO:0009069	serine family amino acid metabolic process	1/40	44/21081	0.0802489411078101	0.236334510410286	0.1881038662972	ENSG00000164300	1	BP	0.235815324149207
GO:0034080	CENP-A containing nucleosome assembly	1/40	44/21081	0.0802489411078101	0.236334510410286	0.1881038662972	ENSG00000123485	1	BP	0.235815324149207
GO:0034142	toll-like receptor 4 signaling pathway	1/40	44/21081	0.0802489411078101	0.236334510410286	0.1881038662972	ENSG00000012504	1	BP	0.235815324149207
GO:0061641	CENP-A containing chromatin organization	1/40	44/21081	0.0802489411078101	0.236334510410286	0.1881038662972	ENSG00000123485	1	BP	0.235815324149207
GO:0030835	negative regulation of actin filament depolymerization	1/40	45/21081	0.08199776662265	0.237405695931118	0.188956446555751	ENSG00000163380	1	BP	0.236982556283043
GO:0031670	cellular response to nutrient	1/40	45/21081	0.08199776662265	0.237405695931118	0.188956446555751	ENSG00000012504	1	BP	0.236982556283043
GO:0032620	interleukin-17 production	1/40	45/21081	0.08199776662265	0.237405695931118	0.188956446555751	ENSG00000012504	1	BP	0.236982556283043
GO:0034383	low-density lipoprotein particle clearance	1/40	45/21081	0.08199776662265	0.237405695931118	0.188956446555751	ENSG00000012504	1	BP	0.236982556283043
GO:0060612	adipose tissue development	1/40	45/21081	0.08199776662265	0.237405695931118	0.188956446555751	ENSG00000012504	1	BP	0.236982556283043
GO:2001020	regulation of response to DNA damage stimulus	2/40	253/21081	0.0831245419926906	0.239857685143892	0.190908039026275	ENSG00000149554/ENSG00000132604	2	BP	0.239580871715919
GO:0010824	regulation of centrosome duplication	1/40	46/21081	0.0837433498768381	0.240026925901171	0.191042741489847	ENSG00000213024	1	BP	0.240049057412626
GO:1901985	positive regulation of protein acetylation	1/40	46/21081	0.0837433498768381	0.240026925901171	0.191042741489847	ENSG00000197181	1	BP	0.240049057412626
GO:0006363	termination of RNA polymerase I transcription	1/40	47/21081	0.0854856967275591	0.24258689435602	0.193080277028436	ENSG00000125482	1	BP	0.242402689580344
GO:0010831	positive regulation of myotube differentiation	1/40	47/21081	0.0854856967275591	0.24258689435602	0.193080277028436	ENSG00000163380	1	BP	0.242402689580344
GO:0090224	regulation of spindle organization	1/40	47/21081	0.0854856967275591	0.24258689435602	0.193080277028436	ENSG00000213024	1	BP	0.242402689580344
GO:0051495	positive regulation of cytoskeleton organization	2/40	258/21081	0.0859469612295326	0.243090910144256	0.193481434346837	ENSG00000213024/ENSG00000163380	2	BP	0.242402689580344
GO:0031055	chromatin remodeling at centromere	1/40	48/21081	0.0872248130216973	0.245893634077614	0.195712184342312	ENSG00000123485	1	BP	0.244340916959704
GO:0007140	male meiotic nuclear division	1/40	49/21081	0.0889607045958492	0.249148117119747	0.198302499408704	ENSG00000143194	1	BP	0.245829826915153
GO:0042059	negative regulation of epidermal growth factor receptor signaling pathway	1/40	49/21081	0.0889607045958492	0.249148117119747	0.198302499408704	ENSG00000213024	1	BP	0.245829826915153
GO:0008089	anterograde axonal transport	1/40	50/21081	0.0906933772763434	0.251038532709844	0.199807123006791	ENSG00000132604	1	BP	0.246369018558027
GO:0010569	regulation of double-strand break repair via homologous recombination	1/40	50/21081	0.0906933772763434	0.251038532709844	0.199807123006791	ENSG00000149554	1	BP	0.246369018558027
GO:1903727	positive regulation of phospholipid metabolic process	1/40	50/21081	0.0906933772763434	0.251038532709844	0.199807123006791	ENSG00000012504	1	BP	0.246369018558027
GO:0032886	regulation of microtubule-based process	2/40	267/21081	0.0911003310067229	0.251038532709844	0.199807123006791	ENSG00000149554/ENSG00000213024	2	BP	0.246369018558027
GO:0072330	monocarboxylic acid biosynthetic process	2/40	267/21081	0.0911003310067229	0.251038532709844	0.199807123006791	ENSG00000012504/ENSG00000115425	2	BP	0.246369018558027
GO:0008206	bile acid metabolic process	1/40	51/21081	0.0924228368792605	0.253055499059189	0.2014124711544	ENSG00000012504	1	BP	0.248032715298423
GO:0035850	epithelial cell differentiation involved in kidney development	1/40	51/21081	0.0924228368792605	0.253055499059189	0.2014124711544	ENSG00000183943	1	BP	0.248032715298423
GO:0032689	negative regulation of interferon-gamma production	1/40	52/21081	0.0941490892104463	0.256961049214498	0.204520984942572	ENSG00000012504	1	BP	0.250641592484418
GO:0071826	ribonucleoprotein complex subunit organization	2/40	273/21081	0.0945862283425039	0.257334595839764	0.204818298967226	ENSG00000126214/ENSG00000164609	2	BP	0.250641592484418
GO:0007080	mitotic metaphase plate congression	1/40	53/21081	0.095872140065531	0.258372402629434	0.205644312355062	ENSG00000213024	1	BP	0.252143728372347
GO:0045839	negative regulation of mitotic nuclear division	1/40	53/21081	0.095872140065531	0.258372402629434	0.205644312355062	ENSG00000149554	1	BP	0.252143728372347
GO:0072666	establishment of protein localization to vacuole	1/40	53/21081	0.095872140065531	0.258372402629434	0.205644312355062	ENSG00000108433	1	BP	0.252143728372347
GO:0090329	regulation of DNA-dependent DNA replication	1/40	54/21081	0.0975919952299488	0.261066018498351	0.207788220827773	ENSG00000132604	1	BP	0.254846004214403
GO:1901185	negative regulation of ERBB signaling pathway	1/40	54/21081	0.0975919952299488	0.261066018498351	0.207788220827773	ENSG00000213024	1	BP	0.254846004214403
GO:0033157	regulation of intracellular protein transport	2/40	279/21081	0.0981108666414763	0.261066018498351	0.207788220827773	ENSG00000139496/ENSG00000213024	2	BP	0.254846004214403
GO:0051321	meiotic cell cycle	2/40	279/21081	0.0981108666414763	0.261066018498351	0.207788220827773	ENSG00000143194/ENSG00000197181	2	BP	0.254846004214403
GO:0021879	forebrain neuron differentiation	1/40	55/21081	0.0993086604789526	0.261066018498351	0.207788220827773	ENSG00000170390	1	BP	0.255434500791829
GO:0030834	regulation of actin filament depolymerization	1/40	55/21081	0.0993086604789526	0.261066018498351	0.207788220827773	ENSG00000163380	1	BP	0.255434500791829
GO:0051445	regulation of meiotic cell cycle	1/40	55/21081	0.0993086604789526	0.261066018498351	0.207788220827773	ENSG00000197181	1	BP	0.255434500791829
GO:0072698	protein localization to microtubule cytoskeleton	1/40	55/21081	0.0993086604789526	0.261066018498351	0.207788220827773	ENSG00000213024	1	BP	0.255434500791829
GO:0046580	negative regulation of Ras protein signal transduction	1/40	56/21081	0.101022141577633	0.26315900107823	0.209454071975303	ENSG00000213024	1	BP	0.257048964265196
GO:0006336	DNA replication-independent nucleosome assembly	1/40	57/21081	0.102732444280933	0.26315900107823	0.209454071975303	ENSG00000123485	1	BP	0.257048964265196
GO:0006376	mRNA splice site selection	1/40	57/21081	0.102732444280933	0.26315900107823	0.209454071975303	ENSG00000164609	1	BP	0.257048964265196
GO:0007129	homologous chromosome pairing at meiosis	1/40	57/21081	0.102732444280933	0.26315900107823	0.209454071975303	ENSG00000143194	1	BP	0.257048964265196
GO:0032663	regulation of interleukin-2 production	1/40	57/21081	0.102732444280933	0.26315900107823	0.209454071975303	ENSG00000012504	1	BP	0.257048964265196
GO:0032692	negative regulation of interleukin-1 production	1/40	57/21081	0.102732444280933	0.26315900107823	0.209454071975303	ENSG00000012504	1	BP	0.257048964265196
GO:0045840	positive regulation of mitotic nuclear division	1/40	57/21081	0.102732444280933	0.26315900107823	0.209454071975303	ENSG00000213024	1	BP	0.257048964265196
GO:0048641	regulation of skeletal muscle tissue development	1/40	57/21081	0.102732444280933	0.26315900107823	0.209454071975303	ENSG00000163380	1	BP	0.257048964265196
GO:0098813	nuclear chromosome segregation	2/40	287/21081	0.102868454330463	0.26315900107823	0.209454071975303	ENSG00000143194/ENSG00000213024	2	BP	0.257048964265196
GO:0034508	centromere complex assembly	1/40	58/21081	0.104439574333671	0.265204115487648	0.211081823786767	ENSG00000123485	1	BP	0.258479169951438
GO:0034724	DNA replication-independent nucleosome organization	1/40	58/21081	0.104439574333671	0.265204115487648	0.211081823786767	ENSG00000123485	1	BP	0.258479169951438
GO:0007281	germ cell development	2/40	290/21081	0.104669119530681	0.265204115487648	0.211081823786767	ENSG00000163596/ENSG00000197181	2	BP	0.258479169951438
GO:0006654	phosphatidic acid biosynthetic process	1/40	59/21081	0.106143537470552	0.265204115487648	0.211081823786767	ENSG00000012504	1	BP	0.258479169951438
GO:0016233	telomere capping	1/40	59/21081	0.106143537470552	0.265204115487648	0.211081823786767	ENSG00000132604	1	BP	0.258479169951438
GO:0030042	actin filament depolymerization	1/40	59/21081	0.106143537470552	0.265204115487648	0.211081823786767	ENSG00000163380	1	BP	0.258479169951438
GO:0032210	regulation of telomere maintenance via telomerase	1/40	59/21081	0.106143537470552	0.265204115487648	0.211081823786767	ENSG00000132604	1	BP	0.258479169951438
GO:0043124	negative regulation of I-kappaB kinase/NF-kappaB signaling	1/40	59/21081	0.106143537470552	0.265204115487648	0.211081823786767	ENSG00000012504	1	BP	0.258479169951438
GO:0044380	protein localization to cytoskeleton	1/40	60/21081	0.107844339416189	0.267029875553548	0.212534986622488	ENSG00000213024	1	BP	0.260809758772025
GO:0045010	actin nucleation	1/40	60/21081	0.107844339416189	0.267029875553548	0.212534986622488	ENSG00000163380	1	BP	0.260809758772025
GO:0071398	cellular response to fatty acid	1/40	60/21081	0.107844339416189	0.267029875553548	0.212534986622488	ENSG00000012504	1	BP	0.260809758772025
GO:0033260	nuclear DNA replication	1/40	61/21081	0.109541985885118	0.267029875553548	0.212534986622488	ENSG00000132604	1	BP	0.261904929888963
GO:0043486	histone exchange	1/40	61/21081	0.109541985885118	0.267029875553548	0.212534986622488	ENSG00000123485	1	BP	0.261904929888963
GO:0046473	phosphatidic acid metabolic process	1/40	61/21081	0.109541985885118	0.267029875553548	0.212534986622488	ENSG00000012504	1	BP	0.261904929888963
GO:0051784	negative regulation of nuclear division	1/40	61/21081	0.109541985885118	0.267029875553548	0.212534986622488	ENSG00000149554	1	BP	0.261904929888963
GO:0090183	regulation of kidney development	1/40	61/21081	0.109541985885118	0.267029875553548	0.212534986622488	ENSG00000183943	1	BP	0.261904929888963
GO:0030258	lipid modification	2/40	300/21081	0.110734036199444	0.267029875553548	0.212534986622488	ENSG00000143797/ENSG00000115425	2	BP	0.262378429766975
GO:0032623	interleukin-2 production	1/40	62/21081	0.111236482581816	0.267029875553548	0.212534986622488	ENSG00000012504	1	BP	0.262378429766975
GO:0061005	cell differentiation involved in kidney development	1/40	62/21081	0.111236482581816	0.267029875553548	0.212534986622488	ENSG00000183943	1	BP	0.262378429766975
GO:0061178	regulation of insulin secretion involved in cellular response to glucose stimulus	1/40	62/21081	0.111236482581816	0.267029875553548	0.212534986622488	ENSG00000012504	1	BP	0.262378429766975
GO:0070317	negative regulation of G0 to G1 transition	1/40	62/21081	0.111236482581816	0.267029875553548	0.212534986622488	ENSG00000149554	1	BP	0.262378429766975
GO:1902041	regulation of extrinsic apoptotic signaling pathway via death domain receptors	1/40	62/21081	0.111236482581816	0.267029875553548	0.212534986622488	ENSG00000120889	1	BP	0.262378429766975
GO:0048747	muscle fiber development	1/40	63/21081	0.112927835200719	0.268830985463934	0.213968529853994	ENSG00000163380	1	BP	0.264588157307699
GO:0051058	negative regulation of small GTPase mediated signal transduction	1/40	63/21081	0.112927835200719	0.268830985463934	0.213968529853994	ENSG00000213024	1	BP	0.264588157307699
GO:0098930	axonal transport	1/40	63/21081	0.112927835200719	0.268830985463934	0.213968529853994	ENSG00000132604	1	BP	0.264588157307699
GO:0016054	organic acid catabolic process	2/40	307/21081	0.11503467307673	0.272322593468282	0.216747577924764	ENSG00000104951/ENSG00000115425	2	BP	0.267137095504985
GO:0046395	carboxylic acid catabolic process	2/40	307/21081	0.11503467307673	0.272322593468282	0.216747577924764	ENSG00000104951/ENSG00000115425	2	BP	0.267137095504985
GO:0140014	mitotic nuclear division	2/40	309/21081	0.116271464558224	0.272322593468282	0.216747577924764	ENSG00000149554/ENSG00000213024	2	BP	0.267137095504985
GO:0021872	forebrain generation of neurons	1/40	65/21081	0.116301130932779	0.272322593468282	0.216747577924764	ENSG00000170390	1	BP	0.267137095504985
GO:0045815	positive regulation of gene expression, epigenetic	1/40	65/21081	0.116301130932779	0.272322593468282	0.216747577924764	ENSG00000149554	1	BP	0.267137095504985
GO:0050999	regulation of nitric-oxide synthase activity	1/40	65/21081	0.116301130932779	0.272322593468282	0.216747577924764	ENSG00000132604	1	BP	0.267137095504985
GO:0044786	cell cycle DNA replication	1/40	66/21081	0.117983085384753	0.273274335607387	0.21750509055283	ENSG00000132604	1	BP	0.268654125161818
GO:0046626	regulation of insulin receptor signaling pathway	1/40	66/21081	0.117983085384753	0.273274335607387	0.21750509055283	ENSG00000012504	1	BP	0.268654125161818
GO:0055081	anion homeostasis	1/40	66/21081	0.117983085384753	0.273274335607387	0.21750509055283	ENSG00000012504	1	BP	0.268654125161818
GO:0070316	regulation of G0 to G1 transition	1/40	66/21081	0.117983085384753	0.273274335607387	0.21750509055283	ENSG00000149554	1	BP	0.268654125161818
GO:0030837	negative regulation of actin filament polymerization	1/40	67/21081	0.119661918436602	0.275672752957441	0.219414043992412	ENSG00000163380	1	BP	0.271302453007124
GO:0045023	G0 to G1 transition	1/40	67/21081	0.119661918436602	0.275672752957441	0.219414043992412	ENSG00000149554	1	BP	0.271302453007124
GO:1904356	regulation of telomere maintenance via telomere lengthening	1/40	68/21081	0.121337635732811	0.277702134138717	0.221029273379461	ENSG00000132604	1	BP	0.273865036703811
GO:0036498	IRE1-mediated unfolded protein response	1/40	69/21081	0.123010242907926	0.277702134138717	0.221029273379461	ENSG00000108433	1	BP	0.273865036703811
GO:0051310	metaphase plate congression	1/40	69/21081	0.123010242907926	0.277702134138717	0.221029273379461	ENSG00000213024	1	BP	0.273865036703811
GO:0072665	protein localization to vacuole	1/40	69/21081	0.123010242907926	0.277702134138717	0.221029273379461	ENSG00000108433	1	BP	0.273865036703811
GO:0090181	regulation of cholesterol metabolic process	1/40	69/21081	0.123010242907926	0.277702134138717	0.221029273379461	ENSG00000012504	1	BP	0.273865036703811
GO:0098840	protein transport along microtubule	1/40	69/21081	0.123010242907926	0.277702134138717	0.221029273379461	ENSG00000132604	1	BP	0.273865036703811
GO:0099118	microtubule-based protein transport	1/40	69/21081	0.123010242907926	0.277702134138717	0.221029273379461	ENSG00000132604	1	BP	0.273865036703811
GO:0006310	DNA recombination	2/40	320/21081	0.123135135324052	0.277702134138717	0.221029273379461	ENSG00000149554/ENSG00000132604	2	BP	0.273865036703811
GO:0030239	myofibril assembly	1/40	70/21081	0.124679745586571	0.278351285402646	0.221545947234434	ENSG00000163380	1	BP	0.275188714599182
GO:0045143	homologous chromosome segregation	1/40	70/21081	0.124679745586571	0.278351285402646	0.221545947234434	ENSG00000143194	1	BP	0.275188714599182
GO:0090068	positive regulation of cell cycle process	2/40	323/21081	0.125024468299834	0.278351285402646	0.221545947234434	ENSG00000213024/ENSG00000197181	2	BP	0.275188714599182
GO:0010830	regulation of myotube differentiation	1/40	71/21081	0.126346149383465	0.278351285402646	0.221545947234434	ENSG00000163380	1	BP	0.275188714599182
GO:0035773	insulin secretion involved in cellular response to glucose stimulus	1/40	71/21081	0.126346149383465	0.278351285402646	0.221545947234434	ENSG00000012504	1	BP	0.275188714599182
GO:0048207	vesicle targeting, rough ER to cis-Golgi	1/40	71/21081	0.126346149383465	0.278351285402646	0.221545947234434	ENSG00000108433	1	BP	0.275188714599182
GO:0048208	COPII vesicle coating	1/40	71/21081	0.126346149383465	0.278351285402646	0.221545947234434	ENSG00000108433	1	BP	0.275188714599182
GO:1901607	alpha-amino acid biosynthetic process	1/40	71/21081	0.126346149383465	0.278351285402646	0.221545947234434	ENSG00000164300	1	BP	0.275188714599182
GO:2000378	negative regulation of reactive oxygen species metabolic process	1/40	71/21081	0.126346149383465	0.278351285402646	0.221545947234434	ENSG00000256053	1	BP	0.275188714599182
GO:0018105	peptidyl-serine phosphorylation	2/40	327/21081	0.127554760808915	0.279916670300822	0.222791871712747	ENSG00000170390/ENSG00000183943	2	BP	0.276106190063741
GO:0034976	response to endoplasmic reticulum stress	2/40	328/21081	0.128189296806562	0.279916670300822	0.222791871712747	ENSG00000108433/ENSG00000120889	2	BP	0.276698795626795
GO:0000281	mitotic cytokinesis	1/40	73/21081	0.129669682741454	0.279916670300822	0.222791871712747	ENSG00000213024	1	BP	0.276698795626795
GO:0006625	protein targeting to peroxisome	1/40	73/21081	0.129669682741454	0.279916670300822	0.222791871712747	ENSG00000115425	1	BP	0.276698795626795
GO:0051298	centrosome duplication	1/40	73/21081	0.129669682741454	0.279916670300822	0.222791871712747	ENSG00000213024	1	BP	0.276698795626795
GO:0072662	protein localization to peroxisome	1/40	73/21081	0.129669682741454	0.279916670300822	0.222791871712747	ENSG00000115425	1	BP	0.276698795626795
GO:0072663	establishment of protein localization to peroxisome	1/40	73/21081	0.129669682741454	0.279916670300822	0.222791871712747	ENSG00000115425	1	BP	0.276698795626795
GO:1901880	negative regulation of protein depolymerization	1/40	73/21081	0.129669682741454	0.279916670300822	0.222791871712747	ENSG00000163380	1	BP	0.276698795626795
GO:0032715	negative regulation of interleukin-6 production	1/40	74/21081	0.131326823482616	0.282072901565419	0.224508063887971	ENSG00000012504	1	BP	0.279102663239823
GO:0070059	intrinsic apoptotic signaling pathway in response to endoplasmic reticulum stress	1/40	74/21081	0.131326823482616	0.282072901565419	0.224508063887971	ENSG00000120889	1	BP	0.279102663239823
GO:0006901	vesicle coating	1/40	75/21081	0.132980887702196	0.282790622235191	0.225079313650315	ENSG00000108433	1	BP	0.27979178772542
GO:0007004	telomere maintenance via telomerase	1/40	75/21081	0.132980887702196	0.282790622235191	0.225079313650315	ENSG00000132604	1	BP	0.27979178772542
GO:0008088	axo-dendritic transport	1/40	75/21081	0.132980887702196	0.282790622235191	0.225079313650315	ENSG00000132604	1	BP	0.27979178772542
GO:1900076	regulation of cellular response to insulin stimulus	1/40	75/21081	0.132980887702196	0.282790622235191	0.225079313650315	ENSG00000012504	1	BP	0.27979178772542
GO:0006278	RNA-dependent DNA biosynthetic process	1/40	77/21081	0.136279808828595	0.287664522576616	0.228958558778661	ENSG00000132604	1	BP	0.285022582281674
GO:0034381	plasma lipoprotein particle clearance	1/40	77/21081	0.136279808828595	0.287664522576616	0.228958558778661	ENSG00000012504	1	BP	0.285022582281674
GO:0043574	peroxisomal transport	1/40	77/21081	0.136279808828595	0.287664522576616	0.228958558778661	ENSG00000115425	1	BP	0.285022582281674
GO:0031647	regulation of protein stability	2/40	342/21081	0.137151916892965	0.288794085447841	0.229857602862127	ENSG00000256053/ENSG00000134086	2	BP	0.286277413832142
GO:0070192	chromosome organization involved in meiotic cell cycle	1/40	78/21081	0.13792467683692	0.289001095474915	0.230022366723264	ENSG00000143194	1	BP	0.286752490182687
GO:0090114	COPII-coated vesicle budding	1/40	78/21081	0.13792467683692	0.289001095474915	0.230022366723264	ENSG00000108433	1	BP	0.286752490182687
GO:0032768	regulation of monooxygenase activity	1/40	79/21081	0.139566490526704	0.291018205307506	0.231627829072363	ENSG00000132604	1	BP	0.28902351975215
GO:0048199	vesicle targeting, to, from or within Golgi	1/40	79/21081	0.139566490526704	0.291018205307506	0.231627829072363	ENSG00000108433	1	BP	0.28902351975215
GO:0071214	cellular response to abiotic stimulus	2/40	348/21081	0.141036189269136	0.292301700238187	0.232649391088061	ENSG00000149554/ENSG00000120889	2	BP	0.290132673254579
GO:0104004	cellular response to environmental stimulus	2/40	348/21081	0.141036189269136	0.292301700238187	0.232649391088061	ENSG00000149554/ENSG00000120889	2	BP	0.290132673254579
GO:0010803	regulation of tumor necrosis factor-mediated signaling pathway	1/40	80/21081	0.141205255424282	0.292301700238187	0.232649391088061	ENSG00000012504	1	BP	0.290132673254579
GO:0018209	peptidyl-serine modification	2/40	350/21081	0.142336417345455	0.293933276301337	0.233947998579213	ENSG00000170390/ENSG00000183943	2	BP	0.291886766174305
GO:0032272	negative regulation of protein polymerization	1/40	82/21081	0.144473660899499	0.295498633391098	0.235193900924193	ENSG00000163380	1	BP	0.293977352545982
GO:0032642	regulation of chemokine production	1/40	82/21081	0.144473660899499	0.295498633391098	0.235193900924193	ENSG00000012504	1	BP	0.293977352545982
GO:0072401	signal transduction involved in DNA integrity checkpoint	1/40	82/21081	0.144473660899499	0.295498633391098	0.235193900924193	ENSG00000149554	1	BP	0.293977352545982
GO:0072422	signal transduction involved in DNA damage checkpoint	1/40	82/21081	0.144473660899499	0.295498633391098	0.235193900924193	ENSG00000149554	1	BP	0.293977352545982
GO:0006360	transcription by RNA polymerase I	1/40	83/21081	0.146103312481194	0.296707437906121	0.236156015185367	ENSG00000125482	1	BP	0.295010911190434
GO:0006521	regulation of cellular amino acid metabolic process	1/40	83/21081	0.146103312481194	0.296707437906121	0.236156015185367	ENSG00000012504	1	BP	0.295010911190434
GO:0072395	signal transduction involved in cell cycle checkpoint	1/40	83/21081	0.146103312481194	0.296707437906121	0.236156015185367	ENSG00000149554	1	BP	0.295010911190434
GO:0032984	protein-containing complex disassembly	2/40	358/21081	0.147563678574837	0.297893073524605	0.237099688809119	ENSG00000126214/ENSG00000163380	2	BP	0.296022655271103
GO:0032024	positive regulation of insulin secretion	1/40	84/21081	0.14772993727883	0.297893073524605	0.237099688809119	ENSG00000012504	1	BP	0.296022655271103
GO:1902117	positive regulation of organelle assembly	1/40	84/21081	0.14772993727883	0.297893073524605	0.237099688809119	ENSG00000213024	1	BP	0.296022655271103
GO:0043407	negative regulation of MAP kinase activity	1/40	85/21081	0.149353540770226	0.300460057371088	0.239142808053141	ENSG00000213024	1	BP	0.297013090529825
GO:0009064	glutamine family amino acid metabolic process	1/40	86/21081	0.15097412842355	0.301596335801824	0.240047197199019	ENSG00000012504	1	BP	0.2985428253789
GO:0034644	cellular response to UV	1/40	86/21081	0.15097412842355	0.301596335801824	0.240047197199019	ENSG00000149554	1	BP	0.2985428253789
GO:0048194	Golgi vesicle budding	1/40	86/21081	0.15097412842355	0.301596335801824	0.240047197199019	ENSG00000108433	1	BP	0.2985428253789
GO:0001960	negative regulation of cytokine-mediated signaling pathway	1/40	87/21081	0.152591705697332	0.301723242649986	0.240148205167587	ENSG00000012504	1	BP	0.299308126381158
GO:0046942	carboxylic acid transport	2/40	368/21081	0.154154272476879	0.301723242649986	0.240148205167587	ENSG00000012504/ENSG00000166558	2	BP	0.299308126381158
GO:0007031	peroxisome organization	1/40	88/21081	0.154206278040483	0.301723242649986	0.240148205167587	ENSG00000115425	1	BP	0.299308126381158
GO:0009060	aerobic respiration	1/40	88/21081	0.154206278040483	0.301723242649986	0.240148205167587	ENSG00000181192	1	BP	0.299308126381158
GO:0010833	telomere maintenance via telomere lengthening	1/40	88/21081	0.154206278040483	0.301723242649986	0.240148205167587	ENSG00000132604	1	BP	0.299308126381158
GO:0021954	central nervous system neuron development	1/40	88/21081	0.154206278040483	0.301723242649986	0.240148205167587	ENSG00000170390	1	BP	0.299308126381158
GO:0050000	chromosome localization	1/40	88/21081	0.154206278040483	0.301723242649986	0.240148205167587	ENSG00000213024	1	BP	0.299308126381158
GO:0051303	establishment of chromosome localization	1/40	88/21081	0.154206278040483	0.301723242649986	0.240148205167587	ENSG00000213024	1	BP	0.299308126381158
GO:2000243	positive regulation of reproductive process	1/40	88/21081	0.154206278040483	0.301723242649986	0.240148205167587	ENSG00000197181	1	BP	0.299308126381158
GO:0015849	organic acid transport	2/40	371/21081	0.156143077629315	0.30317853986051	0.241306508419346	ENSG00000012504/ENSG00000166558	2	BP	0.301662302415337
GO:0021766	hippocampus development	1/40	90/21081	0.157426429682529	0.30317853986051	0.241306508419346	ENSG00000170390	1	BP	0.301662302415337
GO:0032602	chemokine production	1/40	90/21081	0.157426429682529	0.30317853986051	0.241306508419346	ENSG00000012504	1	BP	0.301662302415337
GO:0043242	negative regulation of protein-containing complex disassembly	1/40	90/21081	0.157426429682529	0.30317853986051	0.241306508419346	ENSG00000163380	1	BP	0.301662302415337
GO:0051155	positive regulation of striated muscle cell differentiation	1/40	90/21081	0.157426429682529	0.30317853986051	0.241306508419346	ENSG00000163380	1	BP	0.301662302415337
GO:1901879	regulation of protein depolymerization	1/40	90/21081	0.157426429682529	0.30317853986051	0.241306508419346	ENSG00000163380	1	BP	0.301662302415337
GO:2000779	regulation of double-strand break repair	1/40	90/21081	0.157426429682529	0.30317853986051	0.241306508419346	ENSG00000149554	1	BP	0.301662302415337
GO:0000380	alternative mRNA splicing, via spliceosome	1/40	91/21081	0.159032019831293	0.303542184845029	0.241595941509032	ENSG00000164609	1	BP	0.302534692337288
GO:0008652	cellular amino acid biosynthetic process	1/40	91/21081	0.159032019831293	0.303542184845029	0.241595941509032	ENSG00000164300	1	BP	0.302534692337288
GO:0042058	regulation of epidermal growth factor receptor signaling pathway	1/40	91/21081	0.159032019831293	0.303542184845029	0.241595941509032	ENSG00000213024	1	BP	0.302534692337288
GO:0051781	positive regulation of cell division	1/40	91/21081	0.159032019831293	0.303542184845029	0.241595941509032	ENSG00000213024	1	BP	0.302534692337288
GO:0032386	regulation of intracellular transport	2/40	376/21081	0.159469145287036	0.3037001278022	0.241721651803507	ENSG00000139496/ENSG00000213024	2	BP	0.302818665779715
GO:0003333	amino acid transmembrane transport	1/40	92/21081	0.160634626749194	0.303893764070771	0.241875771194325	ENSG00000166558	1	BP	0.303388918025408
GO:0034502	protein localization to chromosome	1/40	92/21081	0.160634626749194	0.303893764070771	0.241875771194325	ENSG00000132604	1	BP	0.303388918025408
GO:0035418	protein localization to synapse	1/40	92/21081	0.160634626749194	0.303893764070771	0.241875771194325	ENSG00000132604	1	BP	0.303388918025408
GO:0032204	regulation of telomere maintenance	1/40	93/21081	0.162234255837289	0.30490078344859	0.242677280199823	ENSG00000132604	1	BP	0.304225378147644
GO:0060761	negative regulation of response to cytokine stimulus	1/40	93/21081	0.162234255837289	0.30490078344859	0.242677280199823	ENSG00000012504	1	BP	0.304225378147644
GO:0070542	response to fatty acid	1/40	93/21081	0.162234255837289	0.30490078344859	0.242677280199823	ENSG00000012504	1	BP	0.304225378147644
GO:0043044	ATP-dependent chromatin remodeling	1/40	94/21081	0.163830912487113	0.307227772432071	0.244529382221927	ENSG00000123485	1	BP	0.304234506439434
GO:0032465	regulation of cytokinesis	1/40	95/21081	0.165424602080696	0.308987525596215	0.245930008703982	ENSG00000213024	1	BP	0.304896501888421
GO:0007018	microtubule-based movement	2/40	385/21081	0.165490401690388	0.308987525596215	0.245930008703982	ENSG00000126214/ENSG00000132604	2	BP	0.304896501888421
GO:0006919	activation of cysteine-type endopeptidase activity involved in apoptotic process	1/40	96/21081	0.167015329990578	0.310481860741703	0.247119383111986	ENSG00000120889	1	BP	0.306631984555127
GO:0046889	positive regulation of lipid biosynthetic process	1/40	96/21081	0.167015329990578	0.310481860741703	0.247119383111986	ENSG00000012504	1	BP	0.306631984555127
GO:0000245	spliceosomal complex assembly	1/40	97/21081	0.168603101579826	0.311407021667911	0.247855739164535	ENSG00000164609	1	BP	0.307934831357598
GO:0006353	DNA-templated transcription, termination	1/40	97/21081	0.168603101579826	0.311407021667911	0.247855739164535	ENSG00000125482	1	BP	0.307934831357598
GO:0061418	regulation of transcription from RNA polymerase II promoter in response to hypoxia	1/40	97/21081	0.168603101579826	0.311407021667911	0.247855739164535	ENSG00000134086	1	BP	0.307934831357598
GO:1901184	regulation of ERBB signaling pathway	1/40	98/21081	0.170187922202052	0.312985084393045	0.24911175420585	ENSG00000213024	1	BP	0.309753796118614
GO:1901224	positive regulation of NIK/NF-kappaB signaling	1/40	98/21081	0.170187922202052	0.312985084393045	0.24911175420585	ENSG00000120889	1	BP	0.309753796118614
GO:0051052	regulation of DNA metabolic process	2/40	393/21081	0.170877564470352	0.313580455569789	0.24958562329942	ENSG00000149554/ENSG00000132604	2	BP	0.310471844253558
GO:0048477	oogenesis	1/40	99/21081	0.171769797201429	0.313873595312633	0.249818939707162	ENSG00000197181	1	BP	0.311018634519627
GO:1903725	regulation of phospholipid metabolic process	1/40	99/21081	0.171769797201429	0.313873595312633	0.249818939707162	ENSG00000012504	1	BP	0.311018634519627
GO:2001021	negative regulation of response to DNA damage stimulus	1/40	100/21081	0.173348731912703	0.31577999188061	0.251336282919161	ENSG00000132604	1	BP	0.313338257684129
GO:0006903	vesicle targeting	1/40	101/21081	0.174924731661213	0.31577999188061	0.251336282919161	ENSG00000108433	1	BP	0.313493726929465
GO:0043648	dicarboxylic acid metabolic process	1/40	101/21081	0.174924731661213	0.31577999188061	0.251336282919161	ENSG00000012504	1	BP	0.313493726929465
GO:0060993	kidney morphogenesis	1/40	101/21081	0.174924731661213	0.31577999188061	0.251336282919161	ENSG00000183943	1	BP	0.313493726929465
GO:0090502	RNA phosphodiester bond hydrolysis, endonucleolytic	1/40	101/21081	0.174924731661213	0.31577999188061	0.251336282919161	ENSG00000197181	1	BP	0.313493726929465
GO:0045132	meiotic chromosome segregation	1/40	102/21081	0.176497801762908	0.31577999188061	0.251336282919161	ENSG00000143194	1	BP	0.313641363943546
GO:0045844	positive regulation of striated muscle tissue development	1/40	102/21081	0.176497801762908	0.31577999188061	0.251336282919161	ENSG00000163380	1	BP	0.313641363943546
GO:0048636	positive regulation of muscle organ development	1/40	102/21081	0.176497801762908	0.31577999188061	0.251336282919161	ENSG00000163380	1	BP	0.313641363943546
GO:0061640	cytoskeleton-dependent cytokinesis	1/40	102/21081	0.176497801762908	0.31577999188061	0.251336282919161	ENSG00000213024	1	BP	0.313641363943546
GO:2000772	regulation of cellular senescence	1/40	102/21081	0.176497801762908	0.31577999188061	0.251336282919161	ENSG00000132604	1	BP	0.313641363943546
GO:0031058	positive regulation of histone modification	1/40	103/21081	0.178067947524359	0.315950788878624	0.25147222402917	ENSG00000197181	1	BP	0.314307853683935
GO:0033238	regulation of cellular amine metabolic process	1/40	103/21081	0.178067947524359	0.315950788878624	0.25147222402917	ENSG00000012504	1	BP	0.314307853683935
GO:0046470	phosphatidylcholine metabolic process	1/40	103/21081	0.178067947524359	0.315950788878624	0.25147222402917	ENSG00000143797	1	BP	0.314307853683935
GO:1901863	positive regulation of muscle tissue development	1/40	103/21081	0.178067947524359	0.315950788878624	0.25147222402917	ENSG00000163380	1	BP	0.314307853683935
GO:0008625	extrinsic apoptotic signaling pathway via death domain receptors	1/40	104/21081	0.179635174242779	0.31807302546707	0.253161359089432	ENSG00000120889	1	BP	0.316543054109554
GO:0007589	body fluid secretion	1/40	105/21081	0.181199487206038	0.32018136192902	0.254839430731444	ENSG00000122218	1	BP	0.318233490051339
GO:0042147	retrograde transport, endosome to Golgi	1/40	106/21081	0.182760891692678	0.322275893375772	0.25650651465639	ENSG00000108433	1	BP	0.319907584127616
GO:0019058	viral life cycle	2/40	413/21081	0.184475089038633	0.324630700833899	0.258380758018014	ENSG00000139496/ENSG00000213024	2	BP	0.321968033812138
GO:0032414	positive regulation of ion transmembrane transporter activity	1/40	108/21081	0.185874996303727	0.326423917689127	0.259808018992267	ENSG00000256053	1	BP	0.323487130645477
GO:0050810	regulation of steroid biosynthetic process	1/40	109/21081	0.187427706938727	0.328477596823086	0.261442587657507	ENSG00000012504	1	BP	0.324299256084771
GO:0090277	positive regulation of peptide hormone secretion	1/40	110/21081	0.188977530118321	0.330517843492655	0.263066465127115	ENSG00000012504	1	BP	0.326443943652666
GO:0019395	fatty acid oxidation	1/40	111/21081	0.190524471074655	0.331192624791264	0.263603538493815	ENSG00000115425	1	BP	0.32695161626575
GO:0034308	primary alcohol metabolic process	1/40	111/21081	0.190524471074655	0.331192624791264	0.263603538493815	ENSG00000115425	1	BP	0.32695161626575
GO:0042632	cholesterol homeostasis	1/40	111/21081	0.190524471074655	0.331192624791264	0.263603538493815	ENSG00000012504	1	BP	0.32695161626575
GO:0006066	alcohol metabolic process	2/40	423/21081	0.191335748313118	0.331192624791264	0.263603538493815	ENSG00000012504/ENSG00000115425	2	BP	0.32695161626575
GO:0030838	positive regulation of actin filament polymerization	1/40	112/21081	0.19206853503064	0.331192624791264	0.263603538493815	ENSG00000163380	1	BP	0.32695161626575
GO:0055092	sterol homeostasis	1/40	112/21081	0.19206853503064	0.331192624791264	0.263603538493815	ENSG00000012504	1	BP	0.32695161626575
GO:0090342	regulation of cell aging	1/40	112/21081	0.19206853503064	0.331192624791264	0.263603538493815	ENSG00000132604	1	BP	0.32695161626575
GO:0010948	negative regulation of cell cycle process	2/40	427/21081	0.19409034871919	0.334006885245674	0.265843470661667	ENSG00000149554/ENSG00000132604	2	BP	0.32985952641775
GO:0010927	cellular component assembly involved in morphogenesis	1/40	115/21081	0.196683516987494	0.337115548116565	0.26831772422715	ENSG00000163380	1	BP	0.332654437091389
GO:1902414	protein localization to cell junction	1/40	115/21081	0.196683516987494	0.337115548116565	0.26831772422715	ENSG00000132604	1	BP	0.332654437091389
GO:0006892	post-Golgi vesicle-mediated transport	1/40	116/21081	0.198216124987136	0.337555349652186	0.268667772001003	ENSG00000108433	1	BP	0.333015321434473
GO:0032411	positive regulation of transporter activity	1/40	116/21081	0.198216124987136	0.337555349652186	0.268667772001003	ENSG00000256053	1	BP	0.333015321434473
GO:0006900	vesicle budding from membrane	1/40	117/21081	0.199745881963073	0.337555349652186	0.268667772001003	ENSG00000108433	1	BP	0.333015321434473
GO:0034440	lipid oxidation	1/40	117/21081	0.199745881963073	0.337555349652186	0.268667772001003	ENSG00000115425	1	BP	0.333015321434473
GO:0051261	protein depolymerization	1/40	117/21081	0.199745881963073	0.337555349652186	0.268667772001003	ENSG00000163380	1	BP	0.333015321434473
GO:0097006	regulation of plasma lipoprotein particle levels	1/40	117/21081	0.199745881963073	0.337555349652186	0.268667772001003	ENSG00000012504	1	BP	0.333015321434473
GO:1905269	positive regulation of chromatin organization	1/40	117/21081	0.199745881963073	0.337555349652186	0.268667772001003	ENSG00000197181	1	BP	0.333015321434473
GO:0022600	digestive system process	1/40	118/21081	0.201272793083159	0.337555349652186	0.268667772001003	ENSG00000122218	1	BP	0.333447209958241
GO:0032088	negative regulation of NF-kappaB transcription factor activity	1/40	118/21081	0.201272793083159	0.337555349652186	0.268667772001003	ENSG00000012504	1	BP	0.333447209958241
GO:0033108	mitochondrial respiratory chain complex assembly	1/40	118/21081	0.201272793083159	0.337555349652186	0.268667772001003	ENSG00000256053	1	BP	0.333447209958241
GO:1901606	alpha-amino acid catabolic process	1/40	118/21081	0.201272793083159	0.337555349652186	0.268667772001003	ENSG00000104951	1	BP	0.333447209958241
GO:0031124	mRNA 3'-end processing	1/40	119/21081	0.202796863506127	0.338785403557019	0.26964679912172	ENSG00000164609	1	BP	0.334392320389413
GO:1903008	organelle disassembly	1/40	119/21081	0.202796863506127	0.338785403557019	0.26964679912172	ENSG00000126214	1	BP	0.334392320389413
GO:0021761	limbic system development	1/40	121/21081	0.205836502850128	0.343194324790972	0.273155957089664	ENSG00000170390	1	BP	0.338343751559898
GO:0008630	intrinsic apoptotic signaling pathway in response to DNA damage	1/40	122/21081	0.207352082043162	0.345049969535903	0.274632905802697	ENSG00000143194	1	BP	0.340303261013115
GO:2001237	negative regulation of extrinsic apoptotic signaling pathway	1/40	123/21081	0.208864841083111	0.346893738000438	0.27610040192137	ENSG00000120889	1	BP	0.342252044890081
GO:0006906	vesicle fusion	1/40	124/21081	0.210374785083333	0.348052491923584	0.277022679808982	ENSG00000108433	1	BP	0.343122905283204
GO:2000278	regulation of DNA biosynthetic process	1/40	124/21081	0.210374785083333	0.348052491923584	0.277022679808982	ENSG00000132604	1	BP	0.343122905283204
GO:0007173	epidermal growth factor receptor signaling pathway	1/40	125/21081	0.211881919148165	0.348527456257154	0.277400714431783	ENSG00000213024	1	BP	0.343451123180076
GO:0009062	fatty acid catabolic process	1/40	125/21081	0.211881919148165	0.348527456257154	0.277400714431783	ENSG00000115425	1	BP	0.343451123180076
GO:0046620	regulation of organ growth	1/40	125/21081	0.211881919148165	0.348527456257154	0.277400714431783	ENSG00000143194	1	BP	0.343451123180076
GO:0042752	regulation of circadian rhythm	1/40	126/21081	0.213386248372925	0.350329530374706	0.278835025097107	ENSG00000197181	1	BP	0.34535743582818
GO:0014902	myotube differentiation	1/40	127/21081	0.214887777843938	0.352120125453643	0.280260199341596	ENSG00000163380	1	BP	0.346720770386232
GO:0051656	establishment of organelle localization	2/40	459/21081	0.216307682544534	0.352553690743793	0.280605283549687	ENSG00000108433/ENSG00000213024	2	BP	0.347539864573667
GO:0018107	peptidyl-threonine phosphorylation	1/40	128/21081	0.216386512638547	0.352553690743793	0.280605283549687	ENSG00000149554	1	BP	0.347539864573667
GO:0051149	positive regulation of muscle cell differentiation	1/40	128/21081	0.216386512638547	0.352553690743793	0.280605283549687	ENSG00000163380	1	BP	0.347539864573667
GO:0090398	cellular senescence	1/40	129/21081	0.21788245782513	0.352977819198745	0.280942856771832	ENSG00000132604	1	BP	0.347647688353587
GO:0090630	activation of GTPase activity	1/40	129/21081	0.21788245782513	0.352977819198745	0.280942856771832	ENSG00000109436	1	BP	0.347647688353587
GO:1903426	regulation of reactive oxygen species biosynthetic process	1/40	129/21081	0.21788245782513	0.352977819198745	0.280942856771832	ENSG00000256053	1	BP	0.347647688353587
GO:0090174	organelle membrane fusion	1/40	130/21081	0.219375618463111	0.354726235892239	0.28233446030605	ENSG00000108433	1	BP	0.34861503115286
GO:0045088	regulation of innate immune response	2/40	466/21081	0.221203697057777	0.357008603349369	0.284151047067974	ENSG00000159110/ENSG00000249624	2	BP	0.350989878287755
GO:0030968	endoplasmic reticulum unfolded protein response	1/40	132/21081	0.22235360628632	0.357517899788698	0.284556407373428	ENSG00000108433	1	BP	0.351753374155201
GO:0051053	negative regulation of DNA metabolic process	1/40	132/21081	0.22235360628632	0.357517899788698	0.284556407373428	ENSG00000132604	1	BP	0.351753374155201
GO:1903828	negative regulation of cellular protein localization	1/40	133/21081	0.223838443545786	0.359231359772918	0.285920188089235	ENSG00000170390	1	BP	0.353051725616909
GO:0007052	mitotic spindle organization	1/40	135/21081	0.226799829879346	0.362625847400373	0.288621935903017	ENSG00000213024	1	BP	0.356109583631451
GO:0043244	regulation of protein-containing complex disassembly	1/40	135/21081	0.226799829879346	0.362625847400373	0.288621935903017	ENSG00000163380	1	BP	0.356109583631451
GO:0016101	diterpenoid metabolic process	1/40	137/21081	0.229750198687499	0.365298553386246	0.290749201737134	ENSG00000115425	1	BP	0.359134040147472
GO:0018210	peptidyl-threonine modification	1/40	137/21081	0.229750198687499	0.365298553386246	0.290749201737134	ENSG00000149554	1	BP	0.359134040147472
GO:1902750	negative regulation of cell cycle G2/M phase transition	1/40	137/21081	0.229750198687499	0.365298553386246	0.290749201737134	ENSG00000149554	1	BP	0.359134040147472
GO:0009063	cellular amino acid catabolic process	1/40	138/21081	0.231221264007042	0.365602625929954	0.290991219802997	ENSG00000104951	1	BP	0.35982954102871
GO:0051153	regulation of striated muscle cell differentiation	1/40	138/21081	0.231221264007042	0.365602625929954	0.290991219802997	ENSG00000163380	1	BP	0.35982954102871
GO:0071482	cellular response to light stimulus	1/40	138/21081	0.231221264007042	0.365602625929954	0.290991219802997	ENSG00000149554	1	BP	0.35982954102871
GO:0006605	protein targeting	2/40	483/21081	0.233135172584288	0.367273608280763	0.292321191630454	ENSG00000108433/ENSG00000115425	2	BP	0.361737760411019
GO:0044282	small molecule catabolic process	2/40	483/21081	0.233135172584288	0.367273608280763	0.292321191630454	ENSG00000104951/ENSG00000115425	2	BP	0.361737760411019
GO:0051101	regulation of DNA binding	1/40	140/21081	0.234155181374882	0.368203652180319	0.293061434149539	ENSG00000123485	1	BP	0.362785347284795
GO:0042552	myelination	1/40	142/21081	0.237078180808921	0.37143693044469	0.295634871864103	ENSG00000164300	1	BP	0.3641931067262
GO:0046887	positive regulation of hormone secretion	1/40	142/21081	0.237078180808921	0.37143693044469	0.295634871864103	ENSG00000012504	1	BP	0.3641931067262
GO:0000724	double-strand break repair via homologous recombination	1/40	144/21081	0.239990301899887	0.371919871117908	0.296019255032125	ENSG00000149554	1	BP	0.3641931067262
GO:0007272	ensheathment of neurons	1/40	144/21081	0.239990301899887	0.371919871117908	0.296019255032125	ENSG00000164300	1	BP	0.3641931067262
GO:0008366	axon ensheathment	1/40	144/21081	0.239990301899887	0.371919871117908	0.296019255032125	ENSG00000164300	1	BP	0.3641931067262
GO:0019218	regulation of steroid metabolic process	1/40	144/21081	0.239990301899887	0.371919871117908	0.296019255032125	ENSG00000012504	1	BP	0.3641931067262
GO:0042770	signal transduction in response to DNA damage	1/40	144/21081	0.239990301899887	0.371919871117908	0.296019255032125	ENSG00000149554	1	BP	0.3641931067262
GO:1901222	regulation of NIK/NF-kappaB signaling	1/40	144/21081	0.239990301899887	0.371919871117908	0.296019255032125	ENSG00000120889	1	BP	0.3641931067262
GO:0000041	transition metal ion transport	1/40	146/21081	0.242891584098707	0.375059617247913	0.298518248451326	ENSG00000152683	1	BP	0.367129233436551
GO:0000725	recombinational repair	1/40	146/21081	0.242891584098707	0.375059617247913	0.298518248451326	ENSG00000149554	1	BP	0.367129233436551
GO:0038127	ERBB signaling pathway	1/40	147/21081	0.244338172903868	0.376614773702544	0.299756031885093	ENSG00000213024	1	BP	0.368785879332667
GO:0009411	response to UV	1/40	148/21081	0.245782066716988	0.378160199598668	0.300986070552032	ENSG00000149554	1	BP	0.369903768506825
GO:0006721	terpenoid metabolic process	1/40	149/21081	0.247223270430326	0.378339897783552	0.30112909631363	ENSG00000115425	1	BP	0.369955733275537
GO:0031333	negative regulation of protein-containing complex assembly	1/40	149/21081	0.247223270430326	0.378339897783552	0.30112909631363	ENSG00000163380	1	BP	0.369955733275537
GO:0072329	monocarboxylic acid catabolic process	1/40	149/21081	0.247223270430326	0.378339897783552	0.30112909631363	ENSG00000115425	1	BP	0.369955733275537
GO:1903409	reactive oxygen species biosynthetic process	1/40	150/21081	0.248661788927497	0.379187105179475	0.301803407426518	ENSG00000256053	1	BP	0.371052768725854
GO:1904064	positive regulation of cation transmembrane transport	1/40	150/21081	0.248661788927497	0.379187105179475	0.301803407426518	ENSG00000256053	1	BP	0.371052768725854
GO:0071333	cellular response to glucose stimulus	1/40	151/21081	0.250097627083481	0.380699229858869	0.303006940918193	ENSG00000012504	1	BP	0.37266671911023
GO:0007292	female gamete generation	1/40	153/21081	0.252961281828734	0.383017347221246	0.304851981820754	ENSG00000197181	1	BP	0.374810237301166
GO:0008286	insulin receptor signaling pathway	1/40	153/21081	0.252961281828734	0.383017347221246	0.304851981820754	ENSG00000012504	1	BP	0.374810237301166
GO:0071331	cellular response to hexose stimulus	1/40	153/21081	0.252961281828734	0.383017347221246	0.304851981820754	ENSG00000012504	1	BP	0.374810237301166
GO:0046425	regulation of receptor signaling pathway via JAK-STAT	1/40	154/21081	0.254389108124933	0.383823002927936	0.305493221024753	ENSG00000134086	1	BP	0.375867053016053
GO:0071326	cellular response to monosaccharide stimulus	1/40	154/21081	0.254389108124933	0.383823002927936	0.305493221024753	ENSG00000012504	1	BP	0.375867053016053
GO:0032649	regulation of interferon-gamma production	1/40	155/21081	0.255814273493834	0.383945415734179	0.305590652085915	ENSG00000012504	1	BP	0.376386875126592
GO:0043280	positive regulation of cysteine-type endopeptidase activity involved in apoptotic process	1/40	155/21081	0.255814273493834	0.383945415734179	0.305590652085915	ENSG00000120889	1	BP	0.376386875126592
GO:1905039	carboxylic acid transmembrane transport	1/40	155/21081	0.255814273493834	0.383945415734179	0.305590652085915	ENSG00000166558	1	BP	0.376386875126592
GO:0006261	DNA-dependent DNA replication	1/40	156/21081	0.257236782767477	0.384062583330536	0.305683908368467	ENSG00000132604	1	BP	0.376898461659312
GO:0044106	cellular amine metabolic process	1/40	156/21081	0.257236782767477	0.384062583330536	0.305683908368467	ENSG00000012504	1	BP	0.376898461659312
GO:1903825	organic acid transmembrane transport	1/40	156/21081	0.257236782767477	0.384062583330536	0.305683908368467	ENSG00000166558	1	BP	0.376898461659312
GO:0034401	chromatin organization involved in regulation of transcription	1/40	157/21081	0.258656640769355	0.384841564478016	0.306303916700552	ENSG00000149554	1	BP	0.37792609179078
GO:2001251	negative regulation of chromosome organization	1/40	157/21081	0.258656640769355	0.384841564478016	0.306303916700552	ENSG00000132604	1	BP	0.37792609179078
GO:0032652	regulation of interleukin-1 production	1/40	158/21081	0.260073852314434	0.386279534546741	0.307448428896749	ENSG00000012504	1	BP	0.378944172624355
GO:0032273	positive regulation of protein polymerization	1/40	159/21081	0.261488422209164	0.387708612168258	0.308585863397447	ENSG00000163380	1	BP	0.379952790281823
GO:0006865	amino acid transport	1/40	160/21081	0.262900355251493	0.388003672231783	0.30882070823091	ENSG00000166558	1	BP	0.380195086024518
GO:0016571	histone methylation	1/40	161/21081	0.264309656230889	0.388003672231783	0.30882070823091	ENSG00000012504	1	BP	0.380195086024518
GO:0062013	positive regulation of small molecule metabolic process	1/40	161/21081	0.264309656230889	0.388003672231783	0.30882070823091	ENSG00000012504	1	BP	0.380195086024518
GO:0071901	negative regulation of protein serine/threonine kinase activity	1/40	161/21081	0.264309656230889	0.388003672231783	0.30882070823091	ENSG00000213024	1	BP	0.380195086024518
GO:0007043	cell-cell junction assembly	1/40	162/21081	0.265716329928344	0.388003672231783	0.30882070823091	ENSG00000012504	1	BP	0.380195086024518
GO:0007586	digestion	1/40	162/21081	0.265716329928344	0.388003672231783	0.30882070823091	ENSG00000122218	1	BP	0.380195086024518
GO:0071322	cellular response to carbohydrate stimulus	1/40	162/21081	0.265716329928344	0.388003672231783	0.30882070823091	ENSG00000012504	1	BP	0.380195086024518
GO:0045834	positive regulation of lipid metabolic process	1/40	163/21081	0.267120381116397	0.388003672231783	0.30882070823091	ENSG00000012504	1	BP	0.380195086024518
GO:0048284	organelle fusion	1/40	163/21081	0.267120381116397	0.388003672231783	0.30882070823091	ENSG00000108433	1	BP	0.380195086024518
GO:1902850	microtubule cytoskeleton organization involved in mitosis	1/40	163/21081	0.267120381116397	0.388003672231783	0.30882070823091	ENSG00000213024	1	BP	0.380195086024518
GO:1902904	negative regulation of supramolecular fiber organization	1/40	163/21081	0.267120381116397	0.388003672231783	0.30882070823091	ENSG00000163380	1	BP	0.380195086024518
GO:1904892	regulation of receptor signaling pathway via STAT	1/40	163/21081	0.267120381116397	0.388003672231783	0.30882070823091	ENSG00000134086	1	BP	0.380195086024518
GO:0006334	nucleosome assembly	1/40	164/21081	0.268521814559142	0.388066096251576	0.308870392889543	ENSG00000123485	1	BP	0.380195086024518
GO:0034767	positive regulation of ion transmembrane transport	1/40	164/21081	0.268521814559142	0.388066096251576	0.308870392889543	ENSG00000256053	1	BP	0.380195086024518
GO:0045727	positive regulation of translation	1/40	164/21081	0.268521814559142	0.388066096251576	0.308870392889543	ENSG00000197181	1	BP	0.380195086024518
GO:0009308	amine metabolic process	1/40	165/21081	0.269920635012249	0.389430949840904	0.309956710061913	ENSG00000012504	1	BP	0.381661973162481
GO:0007034	vacuolar transport	1/40	166/21081	0.271316847222973	0.390131775285383	0.310514512540598	ENSG00000108433	1	BP	0.38209547962325
GO:0008203	cholesterol metabolic process	1/40	166/21081	0.271316847222973	0.390131775285383	0.310514512540598	ENSG00000012504	1	BP	0.38209547962325
GO:0010970	transport along microtubule	1/40	167/21081	0.272710455930173	0.391478828697082	0.311586662157722	ENSG00000132604	1	BP	0.383544651923184
GO:0007286	spermatid development	1/40	168/21081	0.274101465864322	0.392161863515399	0.312130304683385	ENSG00000163596	1	BP	0.384472989452355
GO:0032612	interleukin-1 production	1/40	168/21081	0.274101465864322	0.392161863515399	0.312130304683385	ENSG00000012504	1	BP	0.384472989452355
GO:0000070	mitotic sister chromatid segregation	1/40	169/21081	0.275489881747525	0.392184100760181	0.31214800379856	ENSG00000213024	1	BP	0.384880950329876
GO:0006720	isoprenoid metabolic process	1/40	169/21081	0.275489881747525	0.392184100760181	0.31214800379856	ENSG00000115425	1	BP	0.384880950329876
GO:0007519	skeletal muscle tissue development	1/40	169/21081	0.275489881747525	0.392184100760181	0.31214800379856	ENSG00000163380	1	BP	0.384880950329876
GO:0001678	cellular glucose homeostasis	1/40	170/21081	0.276875708293532	0.39285179140324	0.312679433555609	ENSG00000012504	1	BP	0.385168967919152
GO:0051494	negative regulation of cytoskeleton organization	1/40	170/21081	0.276875708293532	0.39285179140324	0.312679433555609	ENSG00000163380	1	BP	0.385168967919152
GO:0034620	cellular response to unfolded protein	1/40	171/21081	0.278258950207752	0.393511419683241	0.313204446299502	ENSG00000108433	1	BP	0.385168967919152
GO:1902600	proton transmembrane transport	1/40	171/21081	0.278258950207752	0.393511419683241	0.313204446299502	ENSG00000256053	1	BP	0.385168967919152
GO:0031123	RNA 3'-end processing	1/40	172/21081	0.279639612187269	0.3941630717837	0.313723110625606	ENSG00000164609	1	BP	0.385558154680219
GO:0032609	interferon-gamma production	1/40	172/21081	0.279639612187269	0.3941630717837	0.313723110625606	ENSG00000012504	1	BP	0.385558154680219
GO:0016202	regulation of striated muscle tissue development	1/40	173/21081	0.281017698920853	0.394806832746182	0.314235494220384	ENSG00000163380	1	BP	0.386445253940833
GO:2001056	positive regulation of cysteine-type endopeptidase activity	1/40	173/21081	0.281017698920853	0.394806832746182	0.314235494220384	ENSG00000120889	1	BP	0.386445253940833
GO:0048515	spermatid differentiation	1/40	174/21081	0.282393215088978	0.396089992358845	0.315256789349053	ENSG00000163596	1	BP	0.387829846310189
GO:1902652	secondary alcohol metabolic process	1/40	175/21081	0.283766165363836	0.397365365550338	0.31627188709282	ENSG00000012504	1	BP	0.389207308947529
GO:0002224	toll-like receptor signaling pathway	1/40	176/21081	0.285136554409346	0.397983757538778	0.316764078959808	ENSG00000012504	1	BP	0.390069772742044
GO:1901861	regulation of muscle tissue development	1/40	176/21081	0.285136554409346	0.397983757538778	0.316764078959808	ENSG00000163380	1	BP	0.390069772742044
GO:0048634	regulation of muscle organ development	1/40	177/21081	0.286504386881177	0.398594577203196	0.317250243846553	ENSG00000163380	1	BP	0.390924273669258
GO:0055088	lipid homeostasis	1/40	177/21081	0.286504386881177	0.398594577203196	0.317250243846553	ENSG00000012504	1	BP	0.390924273669258
GO:0000723	telomere maintenance	1/40	178/21081	0.287869667426755	0.399844902730517	0.318245405600166	ENSG00000132604	1	BP	0.39227835509449
GO:0000910	cytokinesis	1/40	179/21081	0.289232400685279	0.401087649493987	0.319234535247932	ENSG00000213024	1	BP	0.393625466391867
GO:0060538	skeletal muscle organ development	1/40	180/21081	0.290592591287737	0.401673952796114	0.319701187019446	ENSG00000163380	1	BP	0.394373365424417
GO:2000241	regulation of reproductive process	1/40	180/21081	0.290592591287737	0.401673952796114	0.319701187019446	ENSG00000197181	1	BP	0.394373365424417
GO:0045931	positive regulation of mitotic cell cycle	1/40	181/21081	0.29195024385692	0.402252988722477	0.320162054525781	ENSG00000213024	1	BP	0.394620970158767
GO:2001236	regulation of extrinsic apoptotic signaling pathway	1/40	181/21081	0.29195024385692	0.402252988722477	0.320162054525781	ENSG00000120889	1	BP	0.394620970158767
GO:0019886	antigen processing and presentation of exogenous peptide antigen via MHC class II	1/40	183/21081	0.294657953345713	0.405332048181823	0.32261274608097	ENSG00000126214	1	BP	0.396976654677004
GO:0016482	cytosolic transport	1/40	185/21081	0.297355565970551	0.406109033674537	0.323231166027268	ENSG00000108433	1	BP	0.399002621684974
GO:0019827	stem cell population maintenance	1/40	185/21081	0.297355565970551	0.406109033674537	0.323231166027268	ENSG00000197181	1	BP	0.399002621684974
GO:0051302	regulation of cell division	1/40	185/21081	0.297355565970551	0.406109033674537	0.323231166027268	ENSG00000213024	1	BP	0.399002621684974
GO:0006941	striated muscle contraction	1/40	186/21081	0.29870059742926	0.406109033674537	0.323231166027268	ENSG00000163380	1	BP	0.399313673112359
GO:0055002	striated muscle cell development	1/40	186/21081	0.29870059742926	0.406109033674537	0.323231166027268	ENSG00000163380	1	BP	0.399313673112359
GO:0015718	monocarboxylic acid transport	1/40	187/21081	0.300043118420063	0.406109033674537	0.323231166027268	ENSG00000012504	1	BP	0.399313673112359
GO:0016125	sterol metabolic process	1/40	187/21081	0.300043118420063	0.406109033674537	0.323231166027268	ENSG00000012504	1	BP	0.399313673112359
GO:0030833	regulation of actin filament polymerization	1/40	187/21081	0.300043118420063	0.406109033674537	0.323231166027268	ENSG00000163380	1	BP	0.399313673112359
GO:0098727	maintenance of cell number	1/40	187/21081	0.300043118420063	0.406109033674537	0.323231166027268	ENSG00000197181	1	BP	0.399313673112359
GO:0000077	DNA damage checkpoint	1/40	188/21081	0.301383133508758	0.406109033674537	0.323231166027268	ENSG00000149554	1	BP	0.399313673112359
GO:0002495	antigen processing and presentation of peptide antigen via MHC class II	1/40	188/21081	0.301383133508758	0.406109033674537	0.323231166027268	ENSG00000126214	1	BP	0.399313673112359
GO:0006665	sphingolipid metabolic process	1/40	188/21081	0.301383133508758	0.406109033674537	0.323231166027268	ENSG00000164300	1	BP	0.399313673112359
GO:0009152	purine ribonucleotide biosynthetic process	1/40	188/21081	0.301383133508758	0.406109033674537	0.323231166027268	ENSG00000152402	1	BP	0.399313673112359
GO:0002504	antigen processing and presentation of peptide or polysaccharide antigen via MHC class II	1/40	189/21081	0.302720647253058	0.406632593567195	0.323647878930839	ENSG00000126214	1	BP	0.400078041344493
GO:0006633	fatty acid biosynthetic process	1/40	189/21081	0.302720647253058	0.406632593567195	0.323647878930839	ENSG00000115425	1	BP	0.400078041344493
GO:0032200	telomere organization	1/40	191/21081	0.305388188898973	0.409573830808169	0.325988874732781	ENSG00000132604	1	BP	0.402981195170634
GO:0007584	response to nutrient	1/40	192/21081	0.30671822587571	0.410714874336693	0.326897056525428	ENSG00000012504	1	BP	0.403839266109196
GO:0030856	regulation of epithelial cell differentiation	1/40	194/21081	0.3093708547643	0.413620627976607	0.329209810144127	ENSG00000183943	1	BP	0.406822674015054
GO:0043409	negative regulation of MAPK cascade	1/40	195/21081	0.310693455703134	0.414741887130196	0.330102245114988	ENSG00000213024	1	BP	0.408051829462793
GO:0002244	hematopoietic progenitor cell differentiation	1/40	196/21081	0.312013586976325	0.415210627389303	0.3304753258592	ENSG00000181192	1	BP	0.408764998130877
GO:0099111	microtubule-based transport	1/40	196/21081	0.312013586976325	0.415210627389303	0.3304753258592	ENSG00000132604	1	BP	0.408764998130877
GO:0032675	regulation of interleukin-6 production	1/40	197/21081	0.3133312530774	0.415488466760521	0.330696464362609	ENSG00000012504	1	BP	0.409471401537174
GO:0034250	positive regulation of cellular amide metabolic process	1/40	197/21081	0.3133312530774	0.415488466760521	0.330696464362609	ENSG00000197181	1	BP	0.409471401537174
GO:0031570	DNA integrity checkpoint	1/40	198/21081	0.314646458491923	0.415488466760521	0.330696464362609	ENSG00000149554	1	BP	0.409663458333544
GO:0061025	membrane fusion	1/40	198/21081	0.314646458491923	0.415488466760521	0.330696464362609	ENSG00000108433	1	BP	0.409663458333544
GO:0090501	RNA phosphodiester bond hydrolysis	1/40	198/21081	0.314646458491923	0.415488466760521	0.330696464362609	ENSG00000197181	1	BP	0.409663458333544
GO:0050714	positive regulation of protein secretion	1/40	199/21081	0.315959207697513	0.416016802180402	0.331116978213966	ENSG00000012504	1	BP	0.410864136585641
GO:0000819	sister chromatid segregation	1/40	200/21081	0.317269505163852	0.416016802180402	0.331116978213966	ENSG00000213024	1	BP	0.411043743143316
GO:0021543	pallium development	1/40	200/21081	0.317269505163852	0.416016802180402	0.331116978213966	ENSG00000170390	1	BP	0.411043743143316
GO:0071478	cellular response to radiation	1/40	200/21081	0.317269505163852	0.416016802180402	0.331116978213966	ENSG00000149554	1	BP	0.411043743143316
GO:0009260	ribonucleotide biosynthetic process	1/40	201/21081	0.318577355352705	0.416016802180402	0.331116978213966	ENSG00000152402	1	BP	0.411724051389491
GO:0055001	muscle cell development	1/40	201/21081	0.318577355352705	0.416016802180402	0.331116978213966	ENSG00000163380	1	BP	0.411724051389491
GO:1901796	regulation of signal transduction by p53 class mediator	1/40	202/21081	0.31988276271793	0.416016802180402	0.331116978213966	ENSG00000149554	1	BP	0.411855903666793
GO:0006479	protein methylation	1/40	203/21081	0.321185731705491	0.416016802180402	0.331116978213966	ENSG00000012504	1	BP	0.411855903666793
GO:0008064	regulation of actin polymerization or depolymerization	1/40	203/21081	0.321185731705491	0.416016802180402	0.331116978213966	ENSG00000163380	1	BP	0.411855903666793
GO:0008213	protein alkylation	1/40	203/21081	0.321185731705491	0.416016802180402	0.331116978213966	ENSG00000012504	1	BP	0.411855903666793
GO:0045333	cellular respiration	1/40	203/21081	0.321185731705491	0.416016802180402	0.331116978213966	ENSG00000181192	1	BP	0.411855903666793
GO:0030832	regulation of actin filament length	1/40	204/21081	0.322486266753474	0.416016802180402	0.331116978213966	ENSG00000163380	1	BP	0.411855903666793
GO:0035265	organ growth	1/40	204/21081	0.322486266753474	0.416016802180402	0.331116978213966	ENSG00000143194	1	BP	0.411855903666793
GO:0035967	cellular response to topologically incorrect protein	1/40	204/21081	0.322486266753474	0.416016802180402	0.331116978213966	ENSG00000108433	1	BP	0.411855903666793
GO:0050796	regulation of insulin secretion	1/40	204/21081	0.322486266753474	0.416016802180402	0.331116978213966	ENSG00000012504	1	BP	0.411855903666793
GO:0021953	central nervous system neuron differentiation	1/40	205/21081	0.323784372292098	0.416016802180402	0.331116978213966	ENSG00000170390	1	BP	0.411855903666793
GO:0034728	nucleosome organization	1/40	205/21081	0.323784372292098	0.416016802180402	0.331116978213966	ENSG00000123485	1	BP	0.411855903666793
GO:0051147	regulation of muscle cell differentiation	1/40	205/21081	0.323784372292098	0.416016802180402	0.331116978213966	ENSG00000163380	1	BP	0.411855903666793
GO:0071897	DNA biosynthetic process	1/40	206/21081	0.325080052743732	0.416432892677696	0.331448153847752	ENSG00000132604	1	BP	0.412029175284827
GO:2001252	positive regulation of chromosome organization	1/40	206/21081	0.325080052743732	0.416432892677696	0.331448153847752	ENSG00000197181	1	BP	0.412029175284827
GO:0006575	cellular modified amino acid metabolic process	1/40	207/21081	0.326373312522906	0.416843411076201	0.331774894524815	ENSG00000164300	1	BP	0.41267394804579
GO:0006986	response to unfolded protein	1/40	207/21081	0.326373312522906	0.416843411076201	0.331774894524815	ENSG00000108433	1	BP	0.41267394804579
GO:0032635	interleukin-6 production	1/40	208/21081	0.327664156036324	0.417869318040371	0.332591436578223	ENSG00000012504	1	BP	0.412922788234661
GO:0007219	Notch signaling pathway	1/40	209/21081	0.328952587682879	0.418200236343775	0.332854821778255	ENSG00000012504	1	BP	0.412922788234661
GO:0046390	ribose phosphate biosynthetic process	1/40	209/21081	0.328952587682879	0.418200236343775	0.332854821778255	ENSG00000152402	1	BP	0.412922788234661
GO:0006164	purine nucleotide biosynthetic process	1/40	211/21081	0.331522232931998	0.418200236343775	0.332854821778255	ENSG00000152402	1	BP	0.412922788234661
GO:0010950	positive regulation of endopeptidase activity	1/40	211/21081	0.331522232931998	0.418200236343775	0.332854821778255	ENSG00000120889	1	BP	0.412922788234661
GO:0031032	actomyosin structure organization	1/40	211/21081	0.331522232931998	0.418200236343775	0.332854821778255	ENSG00000163380	1	BP	0.412922788234661
GO:0043433	negative regulation of DNA-binding transcription factor activity	1/40	211/21081	0.331522232931998	0.418200236343775	0.332854821778255	ENSG00000012504	1	BP	0.412922788234661
GO:0001935	endothelial cell proliferation	1/40	212/21081	0.332803455293413	0.418200236343775	0.332854821778255	ENSG00000183943	1	BP	0.412922788234661
GO:0007051	spindle organization	1/40	212/21081	0.332803455293413	0.418200236343775	0.332854821778255	ENSG00000213024	1	BP	0.412922788234661
GO:0010565	regulation of cellular ketone metabolic process	1/40	212/21081	0.332803455293413	0.418200236343775	0.332854821778255	ENSG00000012504	1	BP	0.412922788234661
GO:0030041	actin filament polymerization	1/40	212/21081	0.332803455293413	0.418200236343775	0.332854821778255	ENSG00000163380	1	BP	0.412922788234661
GO:0031497	chromatin assembly	1/40	214/21081	0.335358721328875	0.420794178885572	0.334919398044403	ENSG00000123485	1	BP	0.41554461111658
GO:0030705	cytoskeleton-dependent intracellular transport	1/40	215/21081	0.336632773715267	0.421159543173699	0.335210199565875	ENSG00000132604	1	BP	0.416142982313115
GO:0034764	positive regulation of transmembrane transport	1/40	215/21081	0.336632773715267	0.421159543173699	0.335210199565875	ENSG00000256053	1	BP	0.416142982313115
GO:0009566	fertilization	1/40	219/21081	0.341705213669231	0.426882460808355	0.339765196344425	ENSG00000143194	1	BP	0.421423077116098
GO:0006367	transcription initiation from RNA polymerase II promoter	1/40	220/21081	0.342967402886623	0.427540200265911	0.34028870573274	ENSG00000012504	1	BP	0.422484435406004
GO:0002793	positive regulation of peptide secretion	1/40	221/21081	0.344227232419461	0.427540200265911	0.34028870573274	ENSG00000012504	1	BP	0.422551981919805
GO:0046578	regulation of Ras protein signal transduction	1/40	221/21081	0.344227232419461	0.427540200265911	0.34028870573274	ENSG00000213024	1	BP	0.422551981919805
GO:0046890	regulation of lipid biosynthetic process	1/40	221/21081	0.344227232419461	0.427540200265911	0.34028870573274	ENSG00000012504	1	BP	0.422551981919805
GO:0006694	steroid biosynthetic process	1/40	222/21081	0.345484706566308	0.428481032601051	0.341037535006425	ENSG00000012504	1	BP	0.423601295230485
GO:0072522	purine-containing compound biosynthetic process	1/40	224/21081	0.347992605858166	0.430967721416833	0.343016745658795	ENSG00000152402	1	BP	0.426179535928743
GO:0009749	response to glucose	1/40	225/21081	0.349243039562231	0.431269862975262	0.343257226810747	ENSG00000012504	1	BP	0.426717395609137
GO:0051650	establishment of vesicle localization	1/40	225/21081	0.349243039562231	0.431269862975262	0.343257226810747	ENSG00000108433	1	BP	0.426717395609137
GO:1902115	regulation of organelle assembly	1/40	226/21081	0.350491134998436	0.432148773119153	0.343956770842242	ENSG00000213024	1	BP	0.427745561506212
GO:0007623	circadian rhythm	1/40	227/21081	0.351736896427353	0.432148773119153	0.343956770842242	ENSG00000197181	1	BP	0.428272239631453
GO:2000377	regulation of reactive oxygen species metabolic process	1/40	227/21081	0.351736896427353	0.432148773119153	0.343956770842242	ENSG00000256053	1	BP	0.428272239631453
GO:0033209	tumor necrosis factor-mediated signaling pathway	1/40	228/21081	0.352980328101992	0.432148773119153	0.343956770842242	ENSG00000012504	1	BP	0.428299083233328
GO:0045216	cell-cell junction organization	1/40	228/21081	0.352980328101992	0.432148773119153	0.343956770842242	ENSG00000012504	1	BP	0.428299083233328
GO:0050728	negative regulation of inflammatory response	1/40	228/21081	0.352980328101992	0.432148773119153	0.343956770842242	ENSG00000012504	1	BP	0.428299083233328
GO:0006338	chromatin remodeling	1/40	229/21081	0.354221434267815	0.43304959938305	0.344673758398595	ENSG00000123485	1	BP	0.428901637125728
GO:0009746	response to hexose	1/40	230/21081	0.355460219162755	0.43394502538815	0.345386447769479	ENSG00000012504	1	BP	0.429820862711745
GO:0010952	positive regulation of peptidase activity	1/40	231/21081	0.356696687017222	0.434217415871817	0.345603249382715	ENSG00000120889	1	BP	0.429833808410215
GO:0038061	NIK/NF-kappaB signaling	1/40	231/21081	0.356696687017222	0.434217415871817	0.345603249382715	ENSG00000120889	1	BP	0.429833808410215
GO:0071456	cellular response to hypoxia	1/40	232/21081	0.357930842054119	0.435101747007632	0.346307108101634	ENSG00000134086	1	BP	0.430827512403814
GO:1902905	positive regulation of supramolecular fiber organization	1/40	234/21081	0.360392230529361	0.4374732883338	0.348194670319109	ENSG00000163380	1	BP	0.433294430305015
GO:0034284	response to monosaccharide	1/40	235/21081	0.361619472376094	0.437723005404396	0.348393425661179	ENSG00000012504	1	BP	0.433778432086261
GO:0040029	regulation of gene expression, epigenetic	1/40	235/21081	0.361619472376094	0.437723005404396	0.348393425661179	ENSG00000149554	1	BP	0.433778432086261
GO:0031669	cellular response to nutrient levels	1/40	236/21081	0.362844418222057	0.438586271391119	0.349080518161819	ENSG00000012504	1	BP	0.434752081969937
GO:0090276	regulation of peptide hormone secretion	1/40	237/21081	0.364067072252814	0.439444339324875	0.349763473417084	ENSG00000012504	1	BP	0.435720773617702
GO:0030073	insulin secretion	1/40	238/21081	0.365287438646495	0.440297236174467	0.35044231289204	ENSG00000012504	1	BP	0.4366845289274
GO:0006643	membrane lipid metabolic process	1/40	239/21081	0.366505521573815	0.440526272073997	0.350624607632438	ENSG00000164300	1	BP	0.437147175391897
GO:0043624	cellular protein complex disassembly	1/40	239/21081	0.366505521573815	0.440526272073997	0.350624607632438	ENSG00000163380	1	BP	0.437147175391897
GO:0043281	regulation of cysteine-type endopeptidase activity involved in apoptotic process	1/40	240/21081	0.367721325198086	0.441368593410027	0.351295029822143	ENSG00000120889	1	BP	0.438013170904131
GO:0006333	chromatin assembly or disassembly	1/40	241/21081	0.368934853675226	0.441588225697861	0.351469840019915	ENSG00000123485	1	BP	0.438013170904131
GO:0008154	actin polymerization or depolymerization	1/40	241/21081	0.368934853675226	0.441588225697861	0.351469840019915	ENSG00000163380	1	BP	0.438013170904131
GO:0002221	pattern recognition receptor signaling pathway	1/40	242/21081	0.370146111153776	0.441803923758755	0.351641518879412	ENSG00000012504	1	BP	0.438013170904131
GO:0035966	response to topologically incorrect protein	1/40	242/21081	0.370146111153776	0.441803923758755	0.351641518879412	ENSG00000108433	1	BP	0.438013170904131
GO:0036294	cellular response to decreased oxygen levels	1/40	243/21081	0.371355101774912	0.442630489876355	0.352299401142146	ENSG00000134086	1	BP	0.438950075356413
GO:0051648	vesicle localization	1/40	244/21081	0.372561829672455	0.443452066707353	0.352953312321273	ENSG00000108433	1	BP	0.439882205180048
GO:0032869	cellular response to insulin stimulus	1/40	245/21081	0.373766298972888	0.444268679916456	0.353603272843903	ENSG00000012504	1	BP	0.440315953549247
GO:0000302	response to reactive oxygen species	1/40	251/21081	0.380945914397418	0.452175413626852	0.359896417159246	ENSG00000256053	1	BP	0.448271926114188
GO:0006814	sodium ion transport	1/40	253/21081	0.383321236645833	0.454365559896928	0.361639603037781	ENSG00000166558	1	BP	0.450563062515549
GO:0032271	regulation of protein polymerization	1/40	256/21081	0.386867566732299	0.457935779957983	0.364481220183963	ENSG00000163380	1	BP	0.453717592198861
GO:0071222	cellular response to lipopolysaccharide	1/40	257/21081	0.388045252078311	0.458696249698087	0.365086494877308	ENSG00000012504	1	BP	0.454086323900315
GO:0097191	extrinsic apoptotic signaling pathway	1/40	258/21081	0.38922073180924	0.45905784209939	0.365374294270595	ENSG00000120889	1	BP	0.454955788737023
GO:0046777	protein autophosphorylation	1/40	259/21081	0.390394009950125	0.45905784209939	0.365374294270595	ENSG00000183943	1	BP	0.455167375940143
GO:0000075	cell cycle checkpoint	1/40	260/21081	0.39156509051885	0.45905784209939	0.365374294270595	ENSG00000149554	1	BP	0.455167375940143
GO:0044242	cellular lipid catabolic process	1/40	260/21081	0.39156509051885	0.45905784209939	0.365374294270595	ENSG00000115425	1	BP	0.455167375940143
GO:0071453	cellular response to oxygen levels	1/40	260/21081	0.39156509051885	0.45905784209939	0.365374294270595	ENSG00000134086	1	BP	0.455167375940143
GO:1902749	regulation of cell cycle G2/M phase transition	1/40	260/21081	0.39156509051885	0.45905784209939	0.365374294270595	ENSG00000149554	1	BP	0.455167375940143
GO:0006323	DNA packaging	1/40	261/21081	0.392733977526162	0.459171921882566	0.36546509289431	ENSG00000123485	1	BP	0.455519453536408
GO:0009743	response to carbohydrate	1/40	261/21081	0.392733977526162	0.459171921882566	0.36546509289431	ENSG00000012504	1	BP	0.455519453536408
GO:2001234	negative regulation of apoptotic signaling pathway	1/40	263/21081	0.395065186863905	0.461268208640827	0.367133573910527	ENSG00000120889	1	BP	0.457718696674921
GO:0016197	endosomal transport	1/40	265/21081	0.397387669906991	0.463348616476587	0.368789416540967	ENSG00000108433	1	BP	0.459903001916561
GO:0022618	ribonucleoprotein complex assembly	1/40	266/21081	0.398545649019391	0.464067420121764	0.369361528267399	ENSG00000164609	1	BP	0.460736288756483
GO:0006469	negative regulation of protein kinase activity	1/40	271/21081	0.404303079005243	0.470132616970818	0.374188952646429	ENSG00000213024	1	BP	0.466367148150784
GO:0071219	cellular response to molecule of bacterial origin	1/40	272/21081	0.405448099516525	0.470825232094393	0.374740220349035	ENSG00000012504	1	BP	0.467175685313674
GO:0042593	glucose homeostasis	1/40	273/21081	0.4065909740429	0.470876303722656	0.37478086938805	ENSG00000012504	1	BP	0.467468529719269
GO:2000116	regulation of cysteine-type endopeptidase activity	1/40	273/21081	0.4065909740429	0.470876303722656	0.37478086938805	ENSG00000120889	1	BP	0.467468529719269
GO:0033500	carbohydrate homeostasis	1/40	274/21081	0.40773170650341	0.470924625974963	0.374819330137905	ENSG00000012504	1	BP	0.467757639303803
GO:0061448	connective tissue development	1/40	274/21081	0.40773170650341	0.470924625974963	0.374819330137905	ENSG00000012504	1	BP	0.467757639303803
GO:0031668	cellular response to extracellular stimulus	1/40	275/21081	0.408870300810127	0.470970225529945	0.374855623832714	ENSG00000012504	1	BP	0.468043042929547
GO:0046474	glycerophospholipid biosynthetic process	1/40	275/21081	0.408870300810127	0.470970225529945	0.374855623832714	ENSG00000012504	1	BP	0.468043042929547
GO:0032412	regulation of ion transmembrane transporter activity	1/40	276/21081	0.410006760868168	0.471645361159758	0.37539297921946	ENSG00000256053	1	BP	0.468833817862296
GO:1901617	organic hydroxy compound biosynthetic process	1/40	277/21081	0.411141090575703	0.472316239441525	0.375926946088691	ENSG00000012504	1	BP	0.469620442221107
GO:0065004	protein-DNA complex assembly	1/40	278/21081	0.412273293823971	0.472982881937274	0.376457541602105	ENSG00000123485	1	BP	0.470402933950996
GO:0006302	double-strand break repair	1/40	282/21081	0.416780919807156	0.477515037800445	0.380064784738301	ENSG00000149554	1	BP	0.475030907515848
GO:0009165	nucleotide biosynthetic process	1/40	284/21081	0.419022074707781	0.479441813116913	0.381598347847153	ENSG00000152402	1	BP	0.477068422719248
GO:0022898	regulation of transmembrane transporter activity	1/40	287/21081	0.422368071029278	0.480703103415792	0.38260223670507	ENSG00000256053	1	BP	0.478805183968535
GO:0030072	peptide hormone secretion	1/40	287/21081	0.422368071029278	0.480703103415792	0.38260223670507	ENSG00000012504	1	BP	0.478805183968535
GO:0042180	cellular ketone metabolic process	1/40	287/21081	0.422368071029278	0.480703103415792	0.38260223670507	ENSG00000012504	1	BP	0.478805183968535
GO:1901293	nucleoside phosphate biosynthetic process	1/40	287/21081	0.422368071029278	0.480703103415792	0.38260223670507	ENSG00000152402	1	BP	0.478805183968535
GO:0006352	DNA-templated transcription, initiation	1/40	290/21081	0.425695275979868	0.483847283176057	0.385104758948701	ENSG00000012504	1	BP	0.482054113359539
GO:0021537	telencephalon development	1/40	291/21081	0.42680018622761	0.484460608737831	0.3855929183346	ENSG00000170390	1	BP	0.482270457477386
GO:0033673	negative regulation of kinase activity	1/40	295/21081	0.431199138039538	0.488754248364309	0.389010321120276	ENSG00000213024	1	BP	0.486196670115321
GO:0015980	energy derivation by oxidation of organic compounds	1/40	296/21081	0.432293722590603	0.488754248364309	0.389010321120276	ENSG00000181192	1	BP	0.486388231192849
GO:0071216	cellular response to biotic stimulus	1/40	296/21081	0.432293722590603	0.488754248364309	0.389010321120276	ENSG00000012504	1	BP	0.486388231192849
GO:0015850	organic hydroxy compound transport	1/40	298/21081	0.434476733966328	0.489929685538346	0.389945877576427	ENSG00000012504	1	BP	0.487800986267425
GO:0046883	regulation of hormone secretion	1/40	298/21081	0.434476733966328	0.489929685538346	0.389945877576427	ENSG00000012504	1	BP	0.487800986267425
GO:0110053	regulation of actin filament organization	1/40	299/21081	0.435565168294449	0.49051162842095	0.390409058793559	ENSG00000163380	1	BP	0.488501659963498
GO:0001822	kidney development	1/40	302/21081	0.438818230720465	0.491516335278287	0.391208727212836	ENSG00000183943	1	BP	0.489022011353739
GO:0030522	intracellular receptor signaling pathway	1/40	302/21081	0.438818230720465	0.491516335278287	0.391208727212836	ENSG00000012504	1	BP	0.489022011353739
GO:0031334	positive regulation of protein-containing complex assembly	1/40	302/21081	0.438818230720465	0.491516335278287	0.391208727212836	ENSG00000163380	1	BP	0.489022011353739
GO:0032409	regulation of transporter activity	1/40	302/21081	0.438818230720465	0.491516335278287	0.391208727212836	ENSG00000256053	1	BP	0.489022011353739
GO:0032868	response to insulin	1/40	303/21081	0.439898517104371	0.491516335278287	0.391208727212836	ENSG00000012504	1	BP	0.489189471452218
GO:0043270	positive regulation of ion transport	1/40	303/21081	0.439898517104371	0.491516335278287	0.391208727212836	ENSG00000256053	1	BP	0.489189471452218
GO:0072331	signal transduction by p53 class mediator	1/40	307/21081	0.444199422875844	0.495675658078905	0.39451922426473	ENSG00000149554	1	BP	0.492835423396393
GO:1901988	negative regulation of cell cycle phase transition	1/40	309/21081	0.446337783660764	0.497414149021164	0.395902927673911	ENSG00000149554	1	BP	0.493740639759331
GO:0043542	endothelial cell migration	1/40	311/21081	0.448468122321708	0.498491803929577	0.396760657061187	ENSG00000183943	1	BP	0.495056101450616
GO:0072001	renal system development	1/40	311/21081	0.448468122321708	0.498491803929577	0.396760657061187	ENSG00000183943	1	BP	0.495056101450616
GO:0048511	rhythmic process	1/40	315/21081	0.452704850472809	0.502549296444556	0.399990105135506	ENSG00000197181	1	BP	0.499209122324313
GO:0050768	negative regulation of neurogenesis	1/40	316/21081	0.453759064379247	0.503067940715413	0.400402905586916	ENSG00000166450	1	BP	0.499847681389495
GO:0044839	cell cycle G2/M phase transition	1/40	317/21081	0.454811298302908	0.503583052513685	0.400812894465231	ENSG00000149554	1	BP	0.500482725747551
GO:0045017	glycerolipid biosynthetic process	1/40	318/21081	0.455861555867341	0.504094649520402	0.401220085843174	ENSG00000012504	1	BP	0.501114270399627
GO:0071824	protein-DNA complex subunit organization	1/40	319/21081	0.456909840689636	0.504602749318322	0.401624493715252	ENSG00000123485	1	BP	0.501742330277136
GO:0072593	reactive oxygen species metabolic process	1/40	321/21081	0.459000506543954	0.506259245956459	0.402942936043463	ENSG00000256053	1	BP	0.503512547324546
GO:0051146	striated muscle cell differentiation	1/40	323/21081	0.461083324673869	0.507902839647179	0.404251108630316	ENSG00000163380	1	BP	0.505270476621781
GO:0051348	negative regulation of transferase activity	1/40	325/21081	0.463158323784782	0.509533611660537	0.405549076160447	ENSG00000213024	1	BP	0.507016187951707
GO:0002478	antigen processing and presentation of exogenous peptide antigen	1/40	337/21081	0.475445713715515	0.521711877918305	0.415242027748034	ENSG00000126214	1	BP	0.519386179469077
GO:0051258	protein polymerization	1/40	337/21081	0.475445713715515	0.521711877918305	0.415242027748034	ENSG00000163380	1	BP	0.519386179469077
GO:0051961	negative regulation of nervous system development	1/40	341/21081	0.479480243058758	0.525466199873856	0.418230175665736	ENSG00000166450	1	BP	0.523250223752918
GO:0098656	anion transmembrane transport	1/40	342/21081	0.480484138443408	0.525893878219669	0.418570574324566	ENSG00000166558	1	BP	0.523802397556959
GO:0009416	response to light stimulus	1/40	345/21081	0.483484511386383	0.527829587589975	0.420111248244554	ENSG00000149554	1	BP	0.525983149926034
GO:0019884	antigen processing and presentation of exogenous antigen	1/40	345/21081	0.483484511386383	0.527829587589975	0.420111248244554	ENSG00000126214	1	BP	0.525983149926034
GO:0046879	hormone secretion	1/40	347/21081	0.485475366854633	0.529328739687558	0.421304456571317	ENSG00000012504	1	BP	0.527603394556894
GO:1903532	positive regulation of secretion by cell	1/40	348/21081	0.486467986962948	0.529737058230301	0.421629446334502	ENSG00000012504	1	BP	0.528136555505698
GO:0001655	urogenital system development	1/40	350/21081	0.488447629070453	0.531217789483983	0.422807993103999	ENSG00000183943	1	BP	0.529193517798267
GO:0048002	antigen processing and presentation of peptide antigen	1/40	355/21081	0.493364237986622	0.535884856723112	0.426522615189555	ENSG00000126214	1	BP	0.5334215604953
GO:0009914	hormone transport	1/40	356/21081	0.494342016162852	0.536267225128562	0.426826950664261	ENSG00000012504	1	BP	0.533929980496222
GO:0071375	cellular response to peptide hormone stimulus	1/40	359/21081	0.497264324369255	0.538755405795767	0.428807348714189	ENSG00000012504	1	BP	0.536535455627135
GO:0051056	regulation of small GTPase mediated signal transduction	1/40	361/21081	0.499203374901137	0.540173348851356	0.429935920967486	ENSG00000213024	1	BP	0.538075768848356
GO:0090305	nucleic acid phosphodiester bond hydrolysis	1/40	364/21081	0.502098285345947	0.542620719472227	0.431883837398518	ENSG00000197181	1	BP	0.540642166001981
GO:1904062	regulation of cation transmembrane transport	1/40	365/21081	0.503059624757356	0.542643737784731	0.431902158182775	ENSG00000256053	1	BP	0.541049133035306
GO:0032147	activation of protein kinase activity	1/40	366/21081	0.504019154348479	0.542643737784731	0.431902158182775	ENSG00000120889	1	BP	0.541049133035306
GO:1903829	positive regulation of cellular protein localization	1/40	366/21081	0.504019154348479	0.542643737784731	0.431902158182775	ENSG00000213024	1	BP	0.541049133035306
GO:0008202	steroid metabolic process	1/40	369/21081	0.506886917370187	0.545046534738081	0.433814597445528	ENSG00000012504	1	BP	0.543572922602892
GO:0016050	vesicle organization	1/40	371/21081	0.508789770991399	0.546057380094045	0.434619151631691	ENSG00000108433	1	BP	0.5449643432459
GO:0010721	negative regulation of cell development	1/40	372/21081	0.509738511172971	0.546057380094045	0.434619151631691	ENSG00000166450	1	BP	0.5449643432459
GO:0071356	cellular response to tumor necrosis factor	1/40	372/21081	0.509738511172971	0.546057380094045	0.434619151631691	ENSG00000012504	1	BP	0.5449643432459
GO:0006936	muscle contraction	1/40	374/21081	0.511630634700767	0.547400067339023	0.435687826120109	ENSG00000163380	1	BP	0.545877715725362
GO:0048638	regulation of developmental growth	1/40	377/21081	0.514455476996388	0.549051486657415	0.437002227297187	ENSG00000143194	1	BP	0.546673900808283
GO:0051047	positive regulation of secretion	1/40	377/21081	0.514455476996388	0.549051486657415	0.437002227297187	ENSG00000012504	1	BP	0.546673900808283
GO:0016042	lipid catabolic process	1/40	380/21081	0.517264385929019	0.551362660125832	0.438841741400895	ENSG00000115425	1	BP	0.549104070633025
GO:0060562	epithelial tube morphogenesis	1/40	382/21081	0.519128183284239	0.552661929285208	0.439875858474255	ENSG00000183943	1	BP	0.550527065337721
GO:0032956	regulation of actin cytoskeleton organization	1/40	383/21081	0.520057449078172	0.552964309999992	0.440116529976042	ENSG00000163380	1	BP	0.550957136384931
GO:0071103	DNA conformation change	1/40	385/21081	0.521910731001424	0.553855851416895	0.440826127517224	ENSG00000123485	1	BP	0.552231085079728
GO:0007265	Ras protein signal transduction	1/40	386/21081	0.522834753554572	0.553855851416895	0.440826127517224	ENSG00000213024	1	BP	0.552231085079728
GO:0043405	regulation of MAP kinase activity	1/40	386/21081	0.522834753554572	0.553855851416895	0.440826127517224	ENSG00000213024	1	BP	0.552231085079728
GO:0031348	negative regulation of defense response	1/40	388/21081	0.524677577860438	0.555121832378266	0.441833749777211	ENSG00000012504	1	BP	0.553621676940001
GO:0010631	epithelial cell migration	1/40	392/21081	0.528342432602687	0.558310067497537	0.444371336655904	ENSG00000183943	1	BP	0.556930099296619
GO:0031589	cell-substrate adhesion	1/40	393/21081	0.529254332776494	0.558584930036275	0.444590105832471	ENSG00000183943	1	BP	0.557332890971843
GO:0051222	positive regulation of protein transport	1/40	394/21081	0.530164513880947	0.558857304300088	0.444806894535967	ENSG00000012504	1	BP	0.557733068602757
GO:0090132	epithelium migration	1/40	395/21081	0.531072979073811	0.558974604160025	0.444900256090028	ENSG00000183943	1	BP	0.558130643342306
GO:0032496	response to lipopolysaccharide	1/40	396/21081	0.531979731507198	0.558974604160025	0.444900256090028	ENSG00000012504	1	BP	0.558361337243645
GO:0019882	antigen processing and presentation	1/40	397/21081	0.532884774327585	0.558974604160025	0.444900256090028	ENSG00000126214	1	BP	0.558361337243645
GO:0050708	regulation of protein secretion	1/40	397/21081	0.532884774327585	0.558974604160025	0.444900256090028	ENSG00000012504	1	BP	0.558361337243645
GO:0043687	post-translational protein modification	1/40	401/21081	0.536487912211868	0.561379903254666	0.4468146868624	ENSG00000134086	1	BP	0.559906035363974
GO:0090130	tissue migration	1/40	401/21081	0.536487912211868	0.561379903254666	0.4468146868624	ENSG00000183943	1	BP	0.559906035363974
GO:0001666	response to hypoxia	1/40	402/21081	0.537384453967745	0.561632289085802	0.447015566330037	ENSG00000134086	1	BP	0.560285872719591
GO:0034612	response to tumor necrosis factor	1/40	403/21081	0.538279304871623	0.561882295097418	0.447214551646659	ENSG00000012504	1	BP	0.560663196757373
GO:0051098	regulation of binding	1/40	405/21081	0.54006394654695	0.563059370061723	0.448151411656324	ENSG00000123485	1	BP	0.561965649621554
GO:0032535	regulation of cellular component size	1/40	409/21081	0.543613076022032	0.56469867412228	0.449456170031613	ENSG00000163380	1	BP	0.563985163683607
GO:0045930	negative regulation of mitotic cell cycle	1/40	409/21081	0.543613076022032	0.56469867412228	0.449456170031613	ENSG00000149554	1	BP	0.563985163683607
GO:1902903	regulation of supramolecular fiber organization	1/40	409/21081	0.543613076022032	0.56469867412228	0.449456170031613	ENSG00000163380	1	BP	0.563985163683607
GO:1904951	positive regulation of establishment of protein localization	1/40	411/21081	0.545377613139311	0.565845780218389	0.450369177155949	ENSG00000012504	1	BP	0.565258373421237
GO:0036293	response to decreased oxygen levels	1/40	415/21081	0.548886754766407	0.568798003427825	0.452718916933281	ENSG00000134086	1	BP	0.568335498045532
GO:0014706	striated muscle tissue development	1/40	417/21081	0.550631408066434	0.569916807624317	0.453609397949465	ENSG00000163380	1	BP	0.569581358196548
GO:0042692	muscle cell differentiation	1/40	419/21081	0.55236948207218	0.571026111140963	0.454492317164336	ENSG00000163380	1	BP	0.570817971650229
GO:0042742	defense response to bacterium	1/40	420/21081	0.553236059398533	0.571232895065715	0.45465690106563	ENSG00000012504	1	BP	0.571152438162176
GO:0045862	positive regulation of proteolysis	1/40	423/21081	0.555825988824108	0.573216452975042	0.456235658696589	ENSG00000120889	1	BP	0.573263666904864
GO:0002237	response to molecule of bacterial origin	1/40	424/21081	0.556686041125736	0.573413386111485	0.456392402137496	ENSG00000012504	1	BP	0.573588359710357
GO:0002791	regulation of peptide secretion	1/40	427/21081	0.559256467405388	0.573991368343015	0.456852430984799	ENSG00000012504	1	BP	0.574548636436004
GO:0006869	lipid transport	1/40	427/21081	0.559256467405388	0.573991368343015	0.456852430984799	ENSG00000012504	1	BP	0.574548636436004
GO:0030900	forebrain development	1/40	427/21081	0.559256467405388	0.573991368343015	0.456852430984799	ENSG00000170390	1	BP	0.574548636436004
GO:0032970	regulation of actin filament-based process	1/40	430/21081	0.56181236030935	0.575924871752527	0.458391349131779	ENSG00000163380	1	BP	0.576611320044328
GO:0006631	fatty acid metabolic process	1/40	433/21081	0.564353799914997	0.576808998853012	0.459095045454464	ENSG00000115425	1	BP	0.578130279676477
GO:1901653	cellular response to peptide	1/40	434/21081	0.565197748384746	0.576808998853012	0.459095045454464	ENSG00000012504	1	BP	0.578130279676477
GO:0000377	RNA splicing, via transesterification reactions with bulged adenosine as nucleophile	1/40	435/21081	0.566040102725068	0.576808998853012	0.459095045454464	ENSG00000164609	1	BP	0.578130279676477
GO:0000398	mRNA splicing, via spliceosome	1/40	435/21081	0.566040102725068	0.576808998853012	0.459095045454464	ENSG00000164609	1	BP	0.578130279676477
GO:0007517	muscle organ development	1/40	435/21081	0.566040102725068	0.576808998853012	0.459095045454464	ENSG00000163380	1	BP	0.578130279676477
GO:0000375	RNA splicing, via transesterification reactions	1/40	438/21081	0.568557630283927	0.577315034541855	0.459497810456454	ENSG00000164609	1	BP	0.579015127839972
GO:0001818	negative regulation of cytokine production	1/40	438/21081	0.568557630283927	0.577315034541855	0.459497810456454	ENSG00000012504	1	BP	0.579015127839972
GO:0060537	muscle tissue development	1/40	438/21081	0.568557630283927	0.577315034541855	0.459497810456454	ENSG00000163380	1	BP	0.579015127839972
GO:0070482	response to oxygen levels	1/40	440/21081	0.57022806499402	0.578325978343047	0.460302442997353	ENSG00000134086	1	BP	0.580154665738597
GO:0019216	regulation of lipid metabolic process	1/40	452/21081	0.580119047551281	0.587661966609276	0.467733162639331	ENSG00000012504	1	BP	0.589078415081031
GO:0043547	positive regulation of GTPase activity	1/40	459/21081	0.585785918645563	0.592701927130162	0.471744578738986	ENSG00000109436	1	BP	0.594259196157312
GO:2001233	regulation of apoptotic signaling pathway	1/40	462/21081	0.588191686288754	0.594434286732857	0.473123402079336	ENSG00000120889	1	BP	0.596124907491108
GO:0007015	actin filament organization	1/40	467/21081	0.592171057448086	0.597750996740883	0.4757632449648	ENSG00000163380	1	BP	0.599003800418641
GO:0034329	cell junction assembly	1/40	471/21081	0.595327537043403	0.60023023440729	0.477736525082508	ENSG00000012504	1	BP	0.60104085313787
GO:0001933	negative regulation of protein phosphorylation	1/40	473/21081	0.596896831818764	0.601105270115958	0.478432985365278	ENSG00000213024	1	BP	0.602047427682972
GO:0043434	response to peptide hormone	1/40	478/21081	0.600794155041935	0.604319942336782	0.48099161411808	ENSG00000012504	1	BP	0.605397941670609
GO:0050673	epithelial cell proliferation	1/40	479/21081	0.601569199151935	0.604390156709506	0.48104749929099	ENSG00000183943	1	BP	0.605598849289795
GO:0009314	response to radiation	1/40	483/21081	0.604654730889952	0.606778810740853	0.482948681889176	ENSG00000149554	1	BP	0.607153893597298
GO:0010876	lipid localization	1/40	484/21081	0.605422466144074	0.606838659047335	0.482996316480591	ENSG00000012504	1	BP	0.607153893597298
GO:0003012	muscle system process	1/40	494/21081	0.613020306634702	0.613020306634702	0.487916426578993	ENSG00000163380	1	BP	0.613020306634702
GO:0019932	second-messenger-mediated signaling	1/40	494/21081	0.613020306634702	0.613020306634702	0.487916426578993	ENSG00000152402	1	BP	0.613020306634702
GO:0017056	structural constituent of nuclear pore	2/40	27/20616	0.00124942916890244	0.133688921072561	0.118366973896021	ENSG00000139496/ENSG00000213024	2	MF	0.0629424430181405
GO:0030674	protein-macromolecule adaptor activity	3/40	258/20616	0.0136096047071952	0.239528354714121	0.212076260937245	ENSG00000108433/ENSG00000213024/ENSG00000134086	3	MF	0.147601073731643
GO:0004896	cytokine receptor activity	2/40	100/20616	0.0161179026580403	0.239528354714121	0.212076260937245	ENSG00000159110/ENSG00000249624	2	MF	0.164621685400567
GO:0032052	bile acid binding	1/40	10/20616	0.0192380384006261	0.239528354714121	0.212076260937245	ENSG00000012504	1	MF	0.166749387109508
GO:0098505	G-rich strand telomeric DNA binding	1/40	10/20616	0.0192380384006261	0.239528354714121	0.212076260937245	ENSG00000132604	1	MF	0.166749387109508
GO:0004690	cyclic nucleotide-dependent protein kinase activity	1/40	11/20616	0.0211418760432532	0.239528354714121	0.212076260937245	ENSG00000183943	1	MF	0.166749387109508
GO:0043047	single-stranded telomeric DNA binding	1/40	12/20616	0.0230421102076923	0.239528354714121	0.212076260937245	ENSG00000132604	1	MF	0.166749387109508
GO:0060090	molecular adaptor activity	3/40	334/20616	0.026770878497796	0.239528354714121	0.212076260937245	ENSG00000108433/ENSG00000213024/ENSG00000134086	3	MF	0.166749387109508
GO:1990756	ubiquitin ligase-substrate adaptor activity	1/40	15/20616	0.0287212582312508	0.239528354714121	0.212076260937245	ENSG00000134086	1	MF	0.167196972589817
GO:0016641	oxidoreductase activity, acting on the CH-NH2 group of donors, oxygen as acceptor	1/40	16/20616	0.0306071448227151	0.239528354714121	0.212076260937245	ENSG00000104951	1	MF	0.168869325407493
GO:0098847	sequence-specific single stranded DNA binding	1/40	16/20616	0.0306071448227151	0.239528354714121	0.212076260937245	ENSG00000132604	1	MF	0.168869325407493
GO:0005523	tropomyosin binding	1/40	17/20616	0.0324894610463606	0.239528354714121	0.212076260937245	ENSG00000163380	1	MF	0.170044343386922
GO:0035173	histone kinase activity	1/40	17/20616	0.0324894610463606	0.239528354714121	0.212076260937245	ENSG00000149554	1	MF	0.170044343386922
GO:0046965	retinoid X receptor binding	1/40	18/20616	0.0343682134886218	0.239528354714121	0.212076260937245	ENSG00000012504	1	MF	0.17723215975505
GO:0016638	oxidoreductase activity, acting on the CH-NH2 group of donors	1/40	21/20616	0.0399831538141123	0.239528354714121	0.212076260937245	ENSG00000104951	1	MF	0.18862007987644
GO:0009975	cyclase activity	1/40	23/20616	0.0437087486773802	0.239528354714121	0.212076260937245	ENSG00000152402	1	MF	0.194608842771263
GO:0016849	phosphorus-oxygen lyase activity	1/40	23/20616	0.0437087486773802	0.239528354714121	0.212076260937245	ENSG00000152402	1	MF	0.194608842771263
GO:0017025	TBP-class protein binding	1/40	27/20616	0.0511176962284303	0.239528354714121	0.212076260937245	ENSG00000163872	1	MF	0.206502681693166
GO:0005385	zinc ion transmembrane transporter activity	1/40	28/20616	0.0529611705181411	0.239528354714121	0.212076260937245	ENSG00000152683	1	MF	0.207607956232483
GO:0008139	nuclear localization sequence binding	1/40	28/20616	0.0529611705181411	0.239528354714121	0.212076260937245	ENSG00000139496	1	MF	0.207607956232483
GO:0016628	oxidoreductase activity, acting on the CH-CH group of donors, NAD or NADP as acceptor	1/40	28/20616	0.0529611705181411	0.239528354714121	0.212076260937245	ENSG00000115425	1	MF	0.207607956232483
GO:0016645	oxidoreductase activity, acting on the CH-NH group of donors	1/40	28/20616	0.0529611705181411	0.239528354714121	0.212076260937245	ENSG00000104951	1	MF	0.207607956232483
GO:0003785	actin monomer binding	1/40	29/20616	0.0548011527009311	0.239528354714121	0.212076260937245	ENSG00000163380	1	MF	0.211175137880511
GO:0042974	retinoic acid receptor binding	1/40	29/20616	0.0548011527009311	0.239528354714121	0.212076260937245	ENSG00000012504	1	MF	0.211175137880511
GO:0034061	DNA polymerase activity	1/40	31/20616	0.0584706665174345	0.239528354714121	0.212076260937245	ENSG00000132604	1	MF	0.216588525268807
GO:0003841	1-acylglycerol-3-phosphate O-acyltransferase activity	1/40	32/20616	0.0603002110080491	0.239528354714121	0.212076260937245	ENSG00000143797	1	MF	0.219177771409581
GO:0004674	protein serine/threonine kinase activity	3/40	469/20616	0.0622246708382586	0.239528354714121	0.212076260937245	ENSG00000149554/ENSG00000170390/ENSG00000183943	3	MF	0.219177771409581
GO:0042171	lysophosphatidic acid acyltransferase activity	1/40	34/20616	0.0639489072096404	0.239528354714121	0.212076260937245	ENSG00000143797	1	MF	0.219836023935385
GO:0005484	SNAP receptor activity	1/40	36/20616	0.0675837889782026	0.239528354714121	0.212076260937245	ENSG00000108433	1	MF	0.221886680285089
GO:0071617	lysophospholipid acyltransferase activity	1/40	36/20616	0.0675837889782026	0.239528354714121	0.212076260937245	ENSG00000143797	1	MF	0.221886680285089
GO:0042162	telomeric DNA binding	1/40	37/20616	0.0693960653844651	0.239528354714121	0.212076260937245	ENSG00000132604	1	MF	0.225573307521528
GO:0016411	acylglycerol O-acyltransferase activity	1/40	41/20616	0.076610889275985	0.24052117733735	0.212955297199818	ENSG00000143797	1	MF	0.233329768457314
GO:0030159	signaling receptor complex adaptor activity	1/40	42/20616	0.0784060564414266	0.24052117733735	0.212955297199818	ENSG00000213024	1	MF	0.2339340072889
GO:0016903	oxidoreductase activity, acting on the aldehyde or oxo group of donors	1/40	43/20616	0.0801978206944809	0.24052117733735	0.212955297199818	ENSG00000181192	1	MF	0.235815324149207
GO:0019894	kinesin binding	1/40	44/20616	0.0819861883206039	0.24052117733735	0.212955297199818	ENSG00000213024	1	MF	0.236982556283043
GO:0051879	Hsp90 protein binding	1/40	46/20616	0.08555275877737	0.24052117733735	0.212955297199818	ENSG00000213024	1	MF	0.242402689580344
GO:0042169	SH2 domain binding	1/40	47/20616	0.0873309741224798	0.24052117733735	0.212955297199818	ENSG00000213024	1	MF	0.244340916959704
GO:0046915	transition metal ion transmembrane transporter activity	1/40	47/20616	0.0873309741224798	0.24052117733735	0.212955297199818	ENSG00000152683	1	MF	0.244340916959704
GO:0042393	histone binding	2/40	258/20616	0.0892652033094946	0.24052117733735	0.212955297199818	ENSG00000123485/ENSG00000163872	2	MF	0.245829826915153
GO:0140296	general transcription initiation factor binding	1/40	49/20616	0.0908772962479451	0.24052117733735	0.212955297199818	ENSG00000163872	1	MF	0.246369018558027
GO:0030544	Hsp70 protein binding	1/40	51/20616	0.0944101817585861	0.24052117733735	0.212955297199818	ENSG00000213024	1	MF	0.250641592484418
GO:0061980	regulatory RNA binding	1/40	51/20616	0.0944101817585861	0.24052117733735	0.212955297199818	ENSG00000197181	1	MF	0.250641592484418
GO:0005048	signal sequence binding	1/40	53/20616	0.0979296802636626	0.243225256032468	0.215349464268787	ENSG00000139496	1	MF	0.254846004214403
GO:0140375	immune receptor activity	2/40	276/20616	0.100017862293725	0.243225256032468	0.215349464268787	ENSG00000159110/ENSG00000249624	2	MF	0.256631197885364
GO:0004879	nuclear receptor activity	1/40	57/20616	0.104928713802989	0.244073312541735	0.216100325910046	ENSG00000012504	1	MF	0.258479169951438
GO:0098531	ligand-activated transcription factor activity	1/40	57/20616	0.104928713802989	0.244073312541735	0.216100325910046	ENSG00000012504	1	MF	0.258479169951438
GO:0016627	oxidoreductase activity, acting on the CH-CH group of donors	1/40	62/20616	0.113603080546118	0.258628289753928	0.228987172433385	ENSG00000115425	1	MF	0.265578757187814
GO:0036002	pre-mRNA binding	1/40	67/20616	0.122195463522557	0.272394054102367	0.241175256952415	ENSG00000164609	1	MF	0.273865036703811
GO:0035591	signaling adaptor activity	1/40	69/20616	0.125609630643852	0.272447370838217	0.24122246311303	ENSG00000213024	1	MF	0.275188714599182
GO:0008374	O-acyltransferase activity	1/40	70/20616	0.127311855531877	0.272447370838217	0.24122246311303	ENSG00000143797	1	MF	0.276106190063741
GO:0033293	monocarboxylic acid binding	1/40	73/20616	0.132399167318045	0.277778645157467	0.245942725668195	ENSG00000012504	1	MF	0.27979178772542
GO:0043130	ubiquitin binding	1/40	81/20616	0.145824384275765	0.290162426847183	0.256907215113098	ENSG00000213024	1	MF	0.295010911190434
GO:0004521	endoribonuclease activity	1/40	82/20616	0.147488227695729	0.290162426847183	0.256907215113098	ENSG00000197181	1	MF	0.296022655271103
GO:0003777	microtubule motor activity	1/40	83/20616	0.149148910996215	0.290162426847183	0.256907215113098	ENSG00000126214	1	MF	0.297013090529825
GO:0015171	amino acid transmembrane transporter activity	1/40	83/20616	0.149148910996215	0.290162426847183	0.256907215113098	ENSG00000166558	1	MF	0.297013090529825
GO:0032182	ubiquitin-like protein binding	1/40	102/20616	0.180109186631495	0.325796292532791	0.288457120786534	ENSG00000213024	1	MF	0.316847599224637
GO:0005525	GTP binding	2/40	400/20616	0.181755011719757	0.325796292532791	0.288457120786534	ENSG00000152402/ENSG00000100228	2	MF	0.318677120548641
GO:0032550	purine ribonucleoside binding	2/40	404/20616	0.184550118240227	0.325796292532791	0.288457120786534	ENSG00000152402/ENSG00000100228	2	MF	0.321968033812138
GO:0016922	nuclear receptor binding	1/40	106/20616	0.186485752833789	0.325796292532791	0.288457120786534	ENSG00000012504	1	MF	0.323487130645477
GO:0001883	purine nucleoside binding	2/40	407/20616	0.18665084439335	0.325796292532791	0.288457120786534	ENSG00000152402/ENSG00000100228	2	MF	0.323487130645477
GO:0032549	ribonucleoside binding	2/40	407/20616	0.18665084439335	0.325796292532791	0.288457120786534	ENSG00000152402/ENSG00000100228	2	MF	0.323487130645477
GO:0001882	nucleoside binding	2/40	414/20616	0.191566526086723	0.325796292532791	0.288457120786534	ENSG00000152402/ENSG00000100228	2	MF	0.32695161626575
GO:0005496	steroid binding	1/40	112/20616	0.195960034654004	0.325796292532791	0.288457120786534	ENSG00000012504	1	MF	0.332499929767761
GO:0019001	guanyl nucleotide binding	2/40	423/20616	0.197913635650761	0.325796292532791	0.288457120786534	ENSG00000152402/ENSG00000100228	2	MF	0.333015321434473
GO:0032561	guanyl ribonucleotide binding	2/40	423/20616	0.197913635650761	0.325796292532791	0.288457120786534	ENSG00000152402/ENSG00000100228	2	MF	0.333015321434473
GO:0003697	single-stranded DNA binding	1/40	122/20616	0.211511956534126	0.342905747714416	0.303605679235587	ENSG00000132604	1	MF	0.343451123180076
GO:0000149	SNARE binding	1/40	126/20616	0.217650260276564	0.344882307742776	0.305355707789964	ENSG00000108433	1	MF	0.347647688353587
GO:0005179	hormone activity	1/40	127/20616	0.219177541369241	0.344882307742776	0.305355707789964	ENSG00000122218	1	MF	0.34861503115286
GO:0140098	catalytic activity, acting on RNA	2/40	461/20616	0.224985362097411	0.348890344122072	0.3089043873191	ENSG00000164609/ENSG00000197181	2	MF	0.354318264859995
GO:0003774	motor activity	1/40	140/20616	0.23876960069943	0.352157035773663	0.311796686863056	ENSG00000126214	1	MF	0.3641931067262
GO:0004540	ribonuclease activity	1/40	140/20616	0.23876960069943	0.352157035773663	0.311796686863056	ENSG00000197181	1	MF	0.3641931067262
GO:0004519	endonuclease activity	1/40	141/20616	0.240256669266144	0.352157035773663	0.311796686863056	ENSG00000197181	1	MF	0.3641931067262
GO:0016779	nucleotidyltransferase activity	1/40	141/20616	0.240256669266144	0.352157035773663	0.311796686863056	ENSG00000132604	1	MF	0.3641931067262
GO:0019842	vitamin binding	1/40	149/20616	0.252051687791671	0.3644531161312	0.322683526333576	ENSG00000181192	1	MF	0.374810237301166
GO:0035257	nuclear hormone receptor binding	1/40	154/20616	0.259332706217017	0.366395927184441	0.324403673847513	ENSG00000012504	1	MF	0.378388359140502
GO:0031072	heat shock protein binding	1/40	155/20616	0.260780594583321	0.366395927184441	0.324403673847513	ENSG00000213024	1	MF	0.379448389352218
GO:0020037	heme binding	1/40	157/20616	0.263668097132729	0.366395927184441	0.324403673847513	ENSG00000152402	1	MF	0.380195086024518
GO:0043021	ribonucleoprotein complex binding	1/40	160/20616	0.267978742244965	0.367611864361682	0.325480253738824	ENSG00000197181	1	MF	0.380195086024518
GO:0046906	tetrapyrrole binding	1/40	167/20616	0.277941452283484	0.36902300131368	0.326729661763218	ENSG00000152402	1	MF	0.385168967919152
GO:0046943	carboxylic acid transmembrane transporter activity	1/40	167/20616	0.277941452283484	0.36902300131368	0.326729661763218	ENSG00000166558	1	MF	0.385168967919152
GO:0005342	organic acid transmembrane transporter activity	1/40	168/20616	0.279353860807552	0.36902300131368	0.326729661763218	ENSG00000166558	1	MF	0.385558154680219
GO:0140030	modification-dependent protein binding	1/40	179/20616	0.294713657131882	0.384565381867212	0.340490746365461	ENSG00000163872	1	MF	0.396976654677004
GO:0051427	hormone receptor binding	1/40	187/20616	0.305683454131337	0.394073850506663	0.348909459376288	ENSG00000012504	1	MF	0.402981195170634
GO:0008022	protein C-terminus binding	1/40	203/20616	0.327126249146253	0.413549068764301	0.366152643273853	ENSG00000132604	1	MF	0.412922788234661
GO:0016829	lyase activity	1/40	207/20616	0.332385232838597	0.413549068764301	0.366152643273853	ENSG00000152402	1	MF	0.412922788234661
GO:0140097	catalytic activity, acting on DNA	1/40	207/20616	0.332385232838597	0.413549068764301	0.366152643273853	ENSG00000132604	1	MF	0.412922788234661
GO:0031406	carboxylic acid binding	1/40	224/20616	0.354292321922298	0.435738832709034	0.385799261621378	ENSG00000012504	1	MF	0.428901637125728
GO:0043177	organic acid binding	1/40	236/20616	0.369332508956171	0.44848491703327	0.397084530575448	ENSG00000012504	1	MF	0.438013170904131
GO:0004518	nuclease activity	1/40	239/20616	0.373038856223935	0.44848491703327	0.397084530575448	ENSG00000197181	1	MF	0.439951655546614
GO:0008514	organic anion transmembrane transporter activity	1/40	251/20616	0.387653025475664	0.460876374732178	0.408055816290173	ENSG00000166558	1	MF	0.454086323900315
GO:0016747	transferase activity, transferring acyl groups other than amino-acyl groups	1/40	261/20616	0.399577324124734	0.469832677816995	0.415985646862072	ENSG00000143797	1	MF	0.461421893500791
GO:0061629	RNA polymerase II-specific DNA-binding transcription factor binding	1/40	284/20616	0.426150499452824	0.492897513915037	0.436407046260239	ENSG00000012504	1	MF	0.482054113359539
GO:1901681	sulfur compound binding	1/40	286/20616	0.428406250412135	0.492897513915037	0.436407046260239	ENSG00000181192	1	MF	0.483565853469491
GO:0016746	transferase activity, transferring acyl groups	1/40	294/20616	0.437343113352276	0.497826735411633	0.440771334845519	ENSG00000143797	1	MF	0.489022011353739
GO:0005096	GTPase activator activity	1/40	301/20616	0.445051000215374	0.501267968663632	0.44381817195993	ENSG00000109436	1	MF	0.492835423396393
GO:0030695	GTPase regulator activity	1/40	342/20616	0.488172133325165	0.541834512057665	0.479735426317657	ENSG00000109436	1	MF	0.529193517798267
GO:0003924	GTPase activity	1/40	345/20616	0.491195772613023	0.541834512057665	0.479735426317657	ENSG00000100228	1	MF	0.531623408219033
GO:0140297	DNA-binding transcription factor binding	1/40	365/20616	0.510912924649183	0.54977188198105	0.486763102590207	ENSG00000012504	1	MF	0.545665377391818
GO:0001227	DNA-binding transcription repressor activity, RNA polymerase II-specific	1/40	367/20616	0.512843164548889	0.54977188198105	0.486763102590207	ENSG00000157429	1	MF	0.546617030501956
GO:0001217	DNA-binding transcription repressor activity	1/40	368/20616	0.513805497178551	0.54977188198105	0.486763102590207	ENSG00000157429	1	MF	0.546673900808283
GO:0008509	anion transmembrane transporter activity	1/40	389/20616	0.533591620174865	0.560715633395418	0.496452602120882	ENSG00000166558	1	MF	0.558545656143242
GO:0060589	nucleoside-triphosphatase regulator activity	1/40	390/20616	0.534513968283483	0.560715633395418	0.496452602120882	ENSG00000109436	1	MF	0.558954964845153
GO:0042277	peptide binding	1/40	431/20616	0.570836653347709	0.59300506706995	0.525041377632027	ENSG00000139496	1	MF	0.58021271432057
GO:0046873	metal ion transmembrane transporter activity	1/40	459/20616	0.594038392814607	0.61088520718671	0.540872293623255	ENSG00000152683	1	MF	0.600315455562888
GO:0003779	actin binding	1/40	470/20616	0.602814736001282	0.61088520718671	0.540872293623255	ENSG00000163380	1	MF	0.606272564314865
GO:0005543	phospholipid binding	1/40	473/20616	0.605175999642909	0.61088520718671	0.540872293623255	ENSG00000213024	1	MF	0.607153893597298
GO:0031267	small GTPase binding	1/40	483/20616	0.612948448581614	0.612948448581614	0.542699069083574	ENSG00000109436	1	MF	0.613020306634702
GO:0033391	chromatoid body	2/40	14/21872	0.000292665956202098	0.0147385628502917	0.0107542145199497	ENSG00000143194/ENSG00000197181	2	CC	0.0599118512530537
GO:0043186	P granule	2/40	20/21872	0.000606832897178445	0.0147385628502917	0.0107542145199497	ENSG00000143194/ENSG00000197181	2	CC	0.0599118512530537
GO:0060293	germ plasm	2/40	20/21872	0.000606832897178445	0.0147385628502917	0.0107542145199497	ENSG00000143194/ENSG00000197181	2	CC	0.0599118512530537
GO:0045495	pole plasm	2/40	21/21872	0.000669934675013261	0.0147385628502917	0.0107542145199497	ENSG00000143194/ENSG00000197181	2	CC	0.0599118512530537
GO:0030426	growth cone	3/40	194/21872	0.00533325794294787	0.0714637630264082	0.0521446117776423	ENSG00000122218/ENSG00000126214/ENSG00000147144	3	CC	0.0948825026773173
GO:0030427	site of polarized growth	3/40	202/21872	0.00596406939482508	0.0714637630264082	0.0521446117776423	ENSG00000122218/ENSG00000126214/ENSG00000147144	3	CC	0.0964460253320014
GO:0018995	host cellular component	2/40	66/21872	0.00649670572967347	0.0714637630264082	0.0521446117776423	ENSG00000139496/ENSG00000213024	2	CC	0.0964460253320014
GO:0043657	host cell	2/40	66/21872	0.00649670572967347	0.0714637630264082	0.0521446117776423	ENSG00000139496/ENSG00000213024	2	CC	0.0964460253320014
GO:0005643	nuclear pore	2/40	87/21872	0.0110604102685248	0.108146233736687	0.0789105294011713	ENSG00000139496/ENSG00000213024	2	CC	0.127863204422946
GO:0120103	centriolar subdistal appendage	1/40	10/21872	0.0181421497057739	0.131010268838845	0.0955936172149469	ENSG00000147144	1	CC	0.166749387109508
GO:0150034	distal axon	3/40	322/21872	0.0209031601493851	0.131010268838845	0.0955936172149469	ENSG00000122218/ENSG00000126214/ENSG00000147144	3	CC	0.166749387109508
GO:0005952	cAMP-dependent protein kinase complex	1/40	12/21872	0.0217318744651944	0.131010268838845	0.0955936172149469	ENSG00000183943	1	CC	0.166749387109508
GO:0001741	XY body	1/40	13/21872	0.0235219350791646	0.131010268838845	0.0955936172149469	ENSG00000143194	1	CC	0.166749387109508
GO:0030126	COPI vesicle coat	1/40	13/21872	0.0235219350791646	0.131010268838845	0.0955936172149469	ENSG00000122218	1	CC	0.166749387109508
GO:0000782	telomere cap complex	1/40	14/21872	0.0253088019347769	0.131010268838845	0.0955936172149469	ENSG00000132604	1	CC	0.166749387109508
GO:0000783	nuclear telomere cap complex	1/40	14/21872	0.0253088019347769	0.131010268838845	0.0955936172149469	ENSG00000132604	1	CC	0.166749387109508
GO:0140445	chromosome, telomeric repeat region	1/40	14/21872	0.0253088019347769	0.131010268838845	0.0955936172149469	ENSG00000132604	1	CC	0.166749387109508
GO:0005671	Ada2/Gcn5/Ada3 transcription activator complex	1/40	15/21872	0.0270924805843615	0.132452127301323	0.0966456909734534	ENSG00000163872	1	CC	0.166749387109508
GO:0010369	chromocenter	1/40	16/21872	0.0288729765708472	0.133615426484669	0.0974945097555601	ENSG00000197181	1	CC	0.167196972589817
GO:0072686	mitotic spindle	2/40	149/21872	0.0303671423828794	0.133615426484669	0.0974945097555601	ENSG00000213024/ENSG00000163872	2	CC	0.168869325407493
GO:0030663	COPI-coated vesicle membrane	1/40	18/21872	0.0324244426793443	0.134957624122127	0.0984738644910257	ENSG00000122218	1	CC	0.170044343386922
GO:0098687	chromosomal region	3/40	388/21872	0.0337394060305318	0.134957624122127	0.0984738644910257	ENSG00000149554/ENSG00000132604/ENSG00000123485	3	CC	0.174846577064628
GO:0005865	striated muscle thin filament	1/40	24/21872	0.0430030306533857	0.162939123278436	0.118890987081155	ENSG00000163380	1	CC	0.194608842771263
GO:0000781	chromosome, telomeric region	2/40	188/21872	0.0463126892579644	0.162939123278436	0.118890987081155	ENSG00000149554/ENSG00000132604	2	CC	0.199682922702153
GO:0031430	M band	1/40	26/21872	0.0465041027205584	0.162939123278436	0.118890987081155	ENSG00000163380	1	CC	0.199682922702153
GO:0030137	COPI-coated vesicle	1/40	28/21872	0.0499926855513382	0.162939123278436	0.118890987081155	ENSG00000122218	1	CC	0.20473932137462
GO:0036379	myofilament	1/40	28/21872	0.0499926855513382	0.162939123278436	0.118890987081155	ENSG00000163380	1	CC	0.20473932137462
GO:0030660	Golgi-associated vesicle membrane	2/40	206/21872	0.0545086743395373	0.167510237649194	0.122226369576565	ENSG00000122218/ENSG00000108433	2	CC	0.211175137880511
GO:0090543	Flemming body	1/40	31/21872	0.0552022374071206	0.167510237649194	0.122226369576565	ENSG00000213024	1	CC	0.211944356760186
GO:0000803	sex chromosome	1/40	36/21872	0.0638229905884036	0.184936882665854	0.134941983763363	ENSG00000143194	1	CC	0.219836023935385
GO:0000793	condensed chromosome	2/40	230/21872	0.0661653740286117	0.184936882665854	0.134941983763363	ENSG00000149554/ENSG00000123485	2	CC	0.220272067968669
GO:0031672	A band	1/40	38/21872	0.0672497755148561	0.184936882665854	0.134941983763363	ENSG00000163380	1	CC	0.221886680285089
GO:0000791	euchromatin	1/40	43/21872	0.0757633204524237	0.202035521206463	0.147418263081271	ENSG00000012504	1	CC	0.233329768457314
GO:1902562	H4 histone acetyltransferase complex	1/40	49/21872	0.0858796016431783	0.206806089475096	0.150899180119388	ENSG00000163872	1	CC	0.242402689580344
GO:0036464	cytoplasmic ribonucleoprotein granule	2/40	271/21872	0.0877736309346738	0.206806089475096	0.150899180119388	ENSG00000143194/ENSG00000197181	2	CC	0.244928009929116
GO:0031201	SNARE complex	1/40	51/21872	0.0892276419536763	0.206806089475096	0.150899180119388	ENSG00000108433	1	CC	0.245829826915153
GO:0043209	myelin sheath	1/40	51/21872	0.0892276419536763	0.206806089475096	0.150899180119388	ENSG00000164300	1	CC	0.245829826915153
GO:0030662	coated vesicle membrane	2/40	277/21872	0.091095419938845	0.206806089475096	0.150899180119388	ENSG00000122218/ENSG00000108433	2	CC	0.246369018558027
GO:0005798	Golgi-associated vesicle	2/40	278/21872	0.0916526987446449	0.206806089475096	0.150899180119388	ENSG00000122218/ENSG00000108433	2	CC	0.247227279690683
GO:0035770	ribonucleoprotein granule	2/40	283/21872	0.0944543996346414	0.207799679196211	0.151624167834556	ENSG00000143194/ENSG00000197181	2	CC	0.250641592484418
GO:0005871	kinesin complex	1/40	59/21872	0.102500648572496	0.213136931017741	0.155518574067969	ENSG00000126214	1	CC	0.257048964265196
GO:0030120	vesicle coat	1/40	59/21872	0.102500648572496	0.213136931017741	0.155518574067969	ENSG00000122218	1	CC	0.257048964265196
GO:1904115	axon cytoplasm	1/40	60/21872	0.104146454929123	0.213136931017741	0.155518574067969	ENSG00000132604	1	CC	0.258479169951438
GO:0005778	peroxisomal membrane	1/40	67/21872	0.115584989970887	0.226032869276402	0.16492828978302	ENSG00000115425	1	CC	0.267137095504985
GO:0031903	microbody membrane	1/40	67/21872	0.115584989970887	0.226032869276402	0.16492828978302	ENSG00000115425	1	CC	0.267137095504985
GO:0031965	nuclear membrane	2/40	339/21872	0.127394513309475	0.243711242852908	0.177827581507505	ENSG00000139496/ENSG00000213024	2	CC	0.276106190063741
GO:0005905	clathrin-coated pit	1/40	83/21872	0.141198097501394	0.254046264532642	0.185368685843196	ENSG00000187239	1	CC	0.290132673254579
GO:0000123	histone acetyltransferase complex	1/40	88/21872	0.149052820439518	0.254046264532642	0.185368685843196	ENSG00000163872	1	CC	0.297013090529825
GO:0120111	neuron projection cytoplasm	1/40	91/21872	0.153731986106539	0.254046264532642	0.185368685843196	ENSG00000132604	1	CC	0.299308126381158
GO:0033116	endoplasmic reticulum-Golgi intermediate compartment membrane	1/40	96/21872	0.161474905031232	0.254046264532642	0.185368685843196	ENSG00000108433	1	CC	0.304225378147644
GO:0005819	spindle	2/40	395/21872	0.162621738159406	0.254046264532642	0.185368685843196	ENSG00000213024/ENSG00000163872	2	CC	0.304234506439434
GO:0071013	catalytic step 2 spliceosome	1/40	97/21872	0.16301517890149	0.254046264532642	0.185368685843196	ENSG00000164609	1	CC	0.304234506439434
GO:0030135	coated vesicle	2/40	397/21872	0.163912594520935	0.254046264532642	0.185368685843196	ENSG00000122218/ENSG00000108433	2	CC	0.304234506439434
GO:0030117	membrane coat	1/40	98/21872	0.164552694072279	0.254046264532642	0.185368685843196	ENSG00000122218	1	CC	0.304234506439434
GO:0031248	protein acetyltransferase complex	1/40	98/21872	0.164552694072279	0.254046264532642	0.185368685843196	ENSG00000163872	1	CC	0.304234506439434
GO:0048475	coated membrane	1/40	98/21872	0.164552694072279	0.254046264532642	0.185368685843196	ENSG00000122218	1	CC	0.304234506439434
GO:1902493	acetyltransferase complex	1/40	98/21872	0.164552694072279	0.254046264532642	0.185368685843196	ENSG00000163872	1	CC	0.304234506439434
GO:0000794	condensed nuclear chromosome	1/40	104/21872	0.173720121447334	0.263575356678713	0.192321731547865	ENSG00000149554	1	CC	0.313470956711141
GO:0000777	condensed chromosome kinetochore	1/40	115/21872	0.190273004637355	0.283797023865885	0.207076775787308	ENSG00000123485	1	CC	0.32695161626575
GO:0030532	small nuclear ribonucleoprotein complex	1/40	123/21872	0.202107935881249	0.293682531357426	0.21428988532061	ENSG00000164609	1	CC	0.334304321614897
GO:0001669	acrosomal vesicle	1/40	124/21872	0.203575391054579	0.293682531357426	0.21428988532061	ENSG00000163596	1	CC	0.335150722049167
GO:0005874	microtubule	2/40	467/21872	0.210109297416726	0.298219647946321	0.217600460822076	ENSG00000126214/ENSG00000170390	2	CC	0.343122905283204
GO:0000779	condensed chromosome, centromeric region	1/40	131/21872	0.213774151078465	0.29860516341119	0.217881757991418	ENSG00000123485	1	CC	0.345453774093004
GO:0098576	lumenal side of membrane	1/40	134/21872	0.218105964176205	0.299895700742282	0.218823418005732	ENSG00000256053	1	CC	0.347647688353587
GO:0120114	Sm-like protein family complex	1/40	138/21872	0.223845533257109	0.303052414255778	0.221126761598116	ENSG00000164609	1	CC	0.353051725616909
GO:0000776	kinetochore	1/40	147/21872	0.236609779057963	0.309754726234698	0.226017204549241	ENSG00000123485	1	CC	0.3641931067262
GO:0005777	peroxisome	1/40	149/21872	0.239418358972304	0.309754726234698	0.226017204549241	ENSG00000115425	1	CC	0.3641931067262
GO:0042579	microbody	1/40	149/21872	0.239418358972304	0.309754726234698	0.226017204549241	ENSG00000115425	1	CC	0.3641931067262
GO:0012507	ER to Golgi transport vesicle membrane	1/40	153/21872	0.245005327179004	0.309754726234698	0.226017204549241	ENSG00000108433	1	CC	0.369263043255461
GO:0005793	endoplasmic reticulum-Golgi intermediate compartment	1/40	154/21872	0.246395804959419	0.309754726234698	0.226017204549241	ENSG00000108433	1	CC	0.369955733275537
GO:0005814	centriole	1/40	167/21872	0.264246377113253	0.32627927636379	0.238074591605158	ENSG00000147144	1	CC	0.380195086024518
GO:0005875	microtubule associated complex	1/40	169/21872	0.266955771570374	0.32627927636379	0.238074591605158	ENSG00000126214	1	CC	0.380195086024518
GO:0000922	spindle pole	1/40	172/21872	0.271001632507547	0.326686899461153	0.23837201994175	ENSG00000213024	1	CC	0.38209547962325
GO:0031902	late endosome membrane	1/40	177/21872	0.277696401809977	0.330233558909162	0.240959893462427	ENSG00000108433	1	CC	0.385168967919152
GO:0030134	COPII-coated ER to Golgi transport vesicle	1/40	187/21872	0.290906588944247	0.338353721561984	0.246884892527285	ENSG00000108433	1	CC	0.394373365424417
GO:0030496	midbody	1/40	188/21872	0.292214577712623	0.338353721561984	0.246884892527285	ENSG00000213024	1	CC	0.394620970158767
GO:0000775	chromosome, centromeric region	1/40	212/21872	0.322909952902098	0.365719369269489	0.266852649825823	ENSG00000123485	1	CC	0.411855903666793
GO:0032993	protein-DNA complex	1/40	213/21872	0.32416035003432	0.365719369269489	0.266852649825823	ENSG00000132604	1	CC	0.411855903666793
GO:0030017	sarcomere	1/40	219/21872	0.331615589113081	0.366135339225563	0.267156168573676	ENSG00000163380	1	CC	0.412922788234661
GO:0032838	plasma membrane bounded cell projection cytoplasm	1/40	220/21872	0.332850308386875	0.366135339225563	0.267156168573676	ENSG00000132604	1	CC	0.412922788234661
GO:0005681	spliceosomal complex	1/40	226/21872	0.340212056411008	0.369613098323071	0.269693767915159	ENSG00000164609	1	CC	0.420074041484015
GO:0030016	myofibril	1/40	239/21872	0.355891832256801	0.381932698031689	0.27868294952073	ENSG00000163380	1	CC	0.429833808410215
GO:0043292	contractile fiber	1/40	251/21872	0.370042624870348	0.392334349260128	0.286272671110859	ENSG00000163380	1	CC	0.438013170904131
GO:0099568	cytoplasmic region	1/40	263/21872	0.383890135659381	0.402170618309828	0.29344985307296	ENSG00000132604	1	CC	0.450728150350077
GO:0030658	transport vesicle membrane	1/40	313/21872	0.438461571996016	0.449795864424238	0.328200331697111	ENSG00000108433	1	CC	0.489022011353739
GO:0005938	cell cortex	1/40	318/21872	0.44365207506349	0.449795864424238	0.328200331697111	ENSG00000187239	1	CC	0.492835423396393
GO:0005770	late endosome	1/40	319/21872	0.444684547783053	0.449795864424238	0.328200331697111	ENSG00000108433	1	CC	0.492835423396393
GO:0016607	nuclear speck	1/40	482/21872	0.590228200061937	0.590228200061937	0.430668901959069	ENSG00000164609	1	CC	0.597613153479459
